# Supplementary material for: Construction of a Nomogram Model for Predicting Peritoneal Dissemination in Gastric Cancer Based on Clinicopathologic Features and Preoperative Serum Tumor Markers
Source: Frontiers journal article supplement (doi:10.3389/fonc.2022.844786), 2022-06-01
Supplement: Table_2.xls [file Table_2.xls]

## Sheet: Sheet1
id	category	group	gender	age	AFP	CEA	CA199	CA50	CA125	CA724	CA242	diamater	T stage	N stage	Venous	Lymphovascular	Perineural
1	0	0	1	68	3.62	2.11	1.13	2.84	29.81	0.81	1.43	1.5	1	0	0	0	0
2	0	0	2	58	2.52	2.59	67.94	21.91	10.46	1.69	34.4	1.5	1	0	0	0	0
4	0	0	1	63	57.51	9.94	12.41	6.73	21.78	31.92	5.31	4	1	1	0	1	0
6	0	0	1	62	5.59	2.17	12.48	5.6	12.23	1.45	5.02	2	1	0	0	0	0
7	0	0	1	54	2.83	1.79	0.6	0.96	12.4	1.91	2.45	1	1	0	0	0	0
10	0	0	2	65	3.76	2.64	7.86	3.87	8.3	1	2.12	3	1	0	0	0	0
12	0	0	2	52	4.58	0.94	6.97	5.41	17.34	0.84	3.07	2.2	1	0	0	0	0
19	0	0	1	57	2.37	3.19	33.94	8.67	24.24	1.65	7.34	2	1	1	0	1	0
25	0	0	2	45	4.96	2.53	38.23	12.61	9.14	1.01	15.39	2	1	0	1	0	0
45	0	0	1	64	2.24	1.45	3.12	3.07	9.25	2.99	2.62	1.5	1	0	0	0	0
53	0	0	2	63	1.32	0.28	6.43	3.83	7.89	2.96	8.39	3	1	0	0	0	0
54	0	0	1	70	4.01	5.45	32.84	14.81	10.53	1.77	13.48	1	1	0	0	0	0
60	0	0	1	54	1.93	6.8	6.74	3.49	6.59	2.59	4.02	4	1	0	0	0	0
67	0	0	2	48	1.89	3.97	7.67	3.59	7.03	10.67	3.24	1.3	1	0	0	0	0
71	0	0	1	73	2.9	3.68	20.08	9.18	5.13	6.46	8.95	1.5	1	0	0	0	0
79	0	0	2	61	4.47	0.6	9.84	10.11	8.9	1.01	3.34	6	1	0	0	0	0
80	0	0	1	64	2.35	5.02	4.88	3.07	6.43	1.08	2.65	2.5	1	0	0	0	0
83	0	0	2	54	2.41	18.16	0.6	0.5	6.18	20.45	1.22	2.5	1	0	0	0	0
93	0	0	1	58	9.63	6.09	4.56	2.21	8.27	37.26	3.61	4	1	0	0	0	0
95	0	0	2	68	3.22	2.81	12.95	6.49	14.9	2.57	4.84	1	1	0	0	0	0
108	0	0	1	43	3.68	5.42	9.67	5.18	10.41	1.8	5.18	2.5	1	0	0	0	0
110	0	0	1	76	0.98	1.99	14.14	12.52	11.5	12.96	5.43	2.5	1	0	0	0	0
111	0	0	1	68	2.3	3.38	7.81	4.03	14.88	2.57	5.37	2.5	1	0	0	0	0
125	0	0	2	55	3.4	1.17	27.02	10.82	11.11	4.54	17.15	1.2	1	0	0	0	0
134	0	0	1	49	3.85	4.12	44.07	12.79	11.6	1.58	31.94	2	1	0	0	0	0
137	0	0	1	65	1.74	1.45	24.97	5.65	7.49	0.71	10.84	2.5	1	0	0	0	0
139	0	0	1	57	1.59	1.86	12.29	4.46	12.09	1.77	4.01	1.5	1	0	0	0	0
140	0	0	2	67	2.96	1.91	358.4	77.64	10.43	2.73	184.8	3	1	0	0	0	0
149	0	0	1	74	2.45	3.01	19.3	6.18	8.99	11.1	6.35	1.5	1	0	0	0	0
165	0	0	1	47	3.5	0.92	7.81	4.13	9.59	0.75	4.8	2	1	0	0	0	0
169	0	0	2	39	3.72	28.88	22.6	6.65	17.48	0.76	12.9	5	1	2	0	1	0
177	0	0	2	25	1.77	1.47	27.04	9.63	38.27	0.71	12.62	2	1	0	0	0	0
181	0	0	1	36	1.75	2.44	12.25	6.06	9.71	1.03	6.37	3	1	0	0	0	0
182	0	0	1	57	2.53	3.32	5.94	2.27	9.2	0.73	3.69	2	1	0	0	0	0
183	0	0	1	57	2.32	3	4.64	0.76	90.09	0.66	2.97	2	1	0	0	0	0
194	0	0	2	43	1.62	2.14	28.93	7.16	9.83	1.39	14.54	1	1	0	0	0	0
204	0	0	2	62	1.62	0.57	3.21	2.38	4.89	4.21	2.71	0.5	1	0	0	0	0
220	0	0	1	59	3.69	1.2	10.36	6.54	13.23	19.83	3.94	4.5	1	0	0	0	0
223	0	0	1	77	2.11	2.71	17.94	8.88	7.4	1.31	6.73	10	1	3	1	1	1
225	0	0	1	73	2.19	3.78	7.69	5.32	6.78	1.83	5.07	3	1	0	0	0	0
227	0	0	1	63	3	3.23	6.38	4.58	9.91	8.74	4.7	2	1	0	0	0	0
228	0	0	2	41	4.46	1.09	15.68	7.71	29.13	0.61	10.8	2	1	0	0	0	0
236	0	0	2	54	1.51	1.29	9	3.63	21.37	1.38	3.61	2	1	0	0	0	0
237	0	0	2	59	1.42	3.71	15.48	4.61	22.23	12.15	6.38	2.5	1	0	0	0	0
238	0	0	1	68	2.67	3.39	8.73	2.64	8.46	1.65	7.31	2	1	1	1	1	0
243	0	0	1	63	2.8	2.22	3.54	3.25	10.83	10	2.59	3	1	0	0	0	0
252	0	0	2	56	1.89	1.42	0.6	0.52	11.72	0.61	0.5	2.5	1	0	0	0	0
258	0	0	1	66	1.77	1.61	3.88	2.41	6.27	3.35	1.68	3	1	0	0	0	0
261	0	0	2	48	2.83	2.05	31.51	11.81	14.8	3.09	13.61	2	1	0	0	0	0
267	0	0	1	51	2.24	1.53	6.33	3.89	26.4	1.54	3.38	6	1	0		0
272	0	0	1	68	1	2.92	12.28	5.47	8.88	9.75	4.94	2	1	0	0	0	0
277	0	0	1	46	2.64	5.1	6.86	3.26	5.96	1.84	3.83	5	1	0	0	0	0
289	0	0	2	42	3.55	0.57	11.54	5.37	35.79	10.43	6.94	0.5	1	0	0	0	0
302	0	0	2	53	1.18	1.24	4.92	3.31	3.31	1.07	4.06	3	1	0	0	0	0
316	0	0	2	53	1.51	3.98	0.6	0.5	17.88	0.93	1.17	1	1	0	0	0	0
328	0	0	1	62	4.21	1.65	18.31	7.33	9.4	0.88	9.12	3	1	0	0	0	0
336	0	0	2	39	1.19	1.96	11.55	3.29	7.44	9.77	7.98	2	1	2	0	1	0
345	0	0	1	53	2.42	0.8	7.68	6.71	7.54	1.47	3.86	2	1	0	0	0	0
346	0	0	2	61	5.39	1.77	7.81	3.4	4.24	1.21	4.3	1	1	0	0	0	0
352	0	0	1	62	2.88	1.95	4.43	3.37	7.68	1	4.91	1	1	0	0	0	0
355	0	0	2	55	1.84	2.75	26.94	15.71	8.67	17.1	5.91	4	1	0	0	0	0
367	0	0	1	63	3630	5.27	31.67	8.69	13.89	3.3	15.78	4	1	0	0	0	0
368	0	0	2	48	1.93	0.67	5.24	1.96	24.92	2	1.66	0.6	1	0	0	0	0
372	0	0	1	30	1.73	38.24	0.6	0.5	6.9	2.48	0.8	2	1	0	0	0	0
374	0	0	2	53	5.51	1.95	9.28	3.76	11.03	1.37	3.77	5	1	0	0	0	0
377	0	0	1	58	2.21	3.19	0.6	0.5	15	3.43	0.9	2	1	0	0	0	0
382	0	0	1	69	1.81	2.69	26.5	11.5	7.13	1.8	9.45	3	1	0	0	0	0
383	0	0	1	51	1.21	3.51	3.51	4.55	12.13	1.29	3.84	4	1	0	0	0	0
386	0	0	2	55	11.14	1.3	8.2	4.26	5.54	1.36	4.44	1	1	1	0	0	0
392	0	0	2	55	1.78	0.51	1.82	0.5	11.89	0.77	2.6	2	1	0	0	0	0
393	0	0	2	66	5.89	1.72	0.6	0.83	5.6	8.03	0.82	1	1	3	0	1	0
397	0	0	1	67	1.82	2.63	3.76	2.05	11.43	4.34	2	1	1	0	0	0	0
410	0	0	1	55	6.52	3.65	2.19	2.7	5.15	2.17	2.17	1	1	0	0	0	0
411	0	0	1	50	1.95	2.11	5.47	6.18	9.89	1.48	3.67	4	1	0	0	0	0
412	0	0	1	61	1.7	4.59	8.29	3.8	8.4	2.79	4.35	1	1	0	0	0	0
415	0	0	1	67	2.98	2.57	7.56	5.42	10.19	0.87	4.99	2	1	0	0	0	0
420	0	0	2	72	2.37	1.81	3.71	2.42	21.2	0.8	2.82	3	1	0	0	0	0
423	0	0	1	60	1.98	3.11	13.49	4.7	5.61	1.78	3.03	3	1	0	0	0	0
436	0	0	2	70	3.32	29.94	13.01	5.86	16.7	300	2.94	3	1	0	0	0	0
439	0	0	1	59	2.45	4.33	6.25	3.11	12.72	0.83	2.84	3	1	0	0	0	0
448	0	0	2	73	2.65	1.64	15.05	6.3	7.9	1.12	5.16	2	1	0	0	0	0
455	0	0	1	69	4.12	3.96	0.6	1.99	13.62	2.26	2	2	1	0	0	0	0
459	0	0	2	35	2.05	2.22	0.6	0.53	14.1	5.32	1.74	4	1	0	0	0	0
468	0	0	1	64	1.36	4.23	5.14	3.7	6.99	1.14	5.77	1.5	1	0	0	0	0
471	0	0	1	70	2.59	3.15	7.69	1.58	10.47	2.1	4.12	3	1	0	1	0	0
478	0	0	2	55	3.13	1.84	8.3	3.87	11.67	1.3	9.22	3	1	1	0	1	0
483	0	0	1	69	3.9	5.03	18.99	10.23	9.23	0.9	5.42	2	1	0	0	0	0
484	0	0	2	27	1.03	1.82	17.11	5.6	11.2	0.82	10.5	3	1	0	0	0	0
488	0	0	1	64	1.42	2.23	7.36	5.36	4.09	5	3.65	2	1	0	0	0	0
491	0	0	2	64	2.28	1.18	4.86	3.11	20.56	0.94	3.3	3	1	0	0	0	0
500	0	0	2	61	1.1	0.98	16.87	6.77	7.48	7.81	5.06	2	1	0	0	0	0
504	0	0	1	72	1.81	1.77	16.01	8.2	13.88	0.91	6.26	1.5	1	0	0	0	0
509	0	0	2	65	2.38	2.9	13.52	6.56	7.62	2.25	3.36	4	1	0	0	0	0
514	0	0	1	43	7.98	1.6	4.44	1.81	8.71	0.85	1.58	4	1	0	0	0	0
521	0	0	1	57	1.56	3.29	7.12	3.37	11.05	0.43	3.48	2	1	0	0	0	0
524	0	0	2	62	2.76	2.49	9.14	3.46	14.94	1.15	3.59	2	1	0	0	0	0
525	0	0	2	46	1.2	1.44	15.57	6.15	6.3	1.34	9.62	4	1	1	0	1	0
541	0	0	1	57	6.66	2.64	9.91	4.09	6.59	0.84	5.82	1.5	1	0	0	0	0
542	0	0	1	61	5.22	7.02	11.17	4.93	9.88	0.7	8.03	2	1	0	0	0	0
545	0	0	1	67	8.06	3.85	19.61	6.16	12.28	0.84	8.96	3	1	0	0	0	0
546	0	0	1	70	3.27	3.98	8.18	3.93	8.62	0.8	3.21	1.5	1	0	0	0	0
553	0	0	1	66	2.1	1.36	2.56	1.81	9.83	1.71	2.65	1	1	0	0	0	0
555	0	0	2	44	2.28	0.62	10.47	3.97	11.32	1.05	5.46	1.5	1	0	0	0	0
562	0	0	1	46	3.09	1.91	3.24	0.75	8.05	7.72	1.2	10	1	0	0	0	0
564	0	0	2	51	2.57	1.13	5.06	1.25	10.87	1.73	2.74	1	1	2	0	1	0
570	0	0	1	66	2.64	1.42	9.84	2.14	10.19	0.41	2.96	5	1	0	0	0	0
576	0	0	1	66	4.38	4.22	29.28	9.86	9.35	2.68	10.53	4	1	0	0	0	0
599	0	0	2	66	2.21	2.45	10.53	36.29	28.1	0.8	2.64	1.5	1	0	0	0	0
603	0	0	1	30	1.4	0.97	3.96	0.5	6.33	7.23	2.34	3	1	0	0	0	0
608	0	0	2	75	5.14	2.74	0.6	0.5	11.66	1.22	2.35	3	1	0	0	0	0
620	0	0	1	28	0.65	2.31	20.09	9.52	6.09	0.97	6.24	1.5	1	0	0	0	0
621	0	0	2	66	3.72	1.19	11.24	4.18	10.04	2.31	4.76	2	1	0	0	0	0
622	0	0	1	61	1.96	2.3	7.09	4.55	8.49	1.15	3.78	1	1	0	0	0	0
623	0	0	1	33	1.88	4.03	0.87	0.5	8.83	0.65	2.24	3	1	0	0	0	0
626	0	0	2	53	4.39	0.83	8.02	3.5	9.7	0.39	4.16	1	1	0	0	0	0
638	0	0	1	62	2.03	1.94	5.29	2.32	5.15	2.1	2.76	1	1	0	0	0	0
648	0	0	2	54	3.87	1.97	8.31	3.6	10.05	0.87	4.02	1	1	0	0	0	1
651	0	0	2	43	2.78	1.11	17.77	5.42	7.55	0.79	12.77	7	1	3	0	1	0
653	0	0	1	52	1.89	1.08	144	23.33	2.76	1.05	54.37	4.5	1	0	0	0	0
971	0	1	2	62	2.92	0.91	4.05	3.75		14.56	2.26	6.5	1	0	0	0	1
97	0	0	2	69	2.95	6.53	15.12	6.35	7.09	11.99	7.48	2	2	0	0	0	0
103	0	0	1	62	3.92	1.81	6.71	4.56	3.93	4.32	4.48	2	2	0	0	0	0
155	0	0	1	66	1.92	2.01	8.18	4.28	5.89	0.94	3.04	1	2	0	0	0	0
156	0	0	2	57	1.71	1.53	3.06	3.33	9.71	15.7	2.21	3	2	2	1	1	0
160	0	0	1	54	2.92	0.25	12.75	4.33	11.74	0.72	5.64	3	2	2	1	1	0
167	0	0	1	55	2.87	2.24	5.07	2.44	11.17	4.02	2.57	2	2	0	0	0	0
179	0	0	1	58	1.93	2.57	20.29	12.4	5.01	0.73	9.63	4	2	0	0	0	0
180	0	0	1	53	2.02	1.91	9.27	6.71	6.55	1.01	4.98	2	2	0	0	0	0
190	0	0	1	60	5.34	3.44	9.47	2.94	4.43	2.19	4.45	1.5	2	0	1	0	1
191	0	0	1	65	3.5	3.35	15.5	5.71	6.95	3.09	5.01	2	2	0	0	0	0
197	0	0	2	65	1.69	2.64	31.89	11.73	11.2	1.1	11.17	2	2	0	0	0	0
198	0	0	2	60	2.03	1.84	7.13	2.94	10.38	6.96	2.69	2	2	0	0	0	0
201	0	0	2	53	1.25	1.92	13.46	7.17	9.96	2.47	7.27	1	2	2	0	1	0
203	0	0	1	69	2.82	2.73	6.76	4.36	9	8.83	2.25	3.5	2	0	0	0	0
205	0	0	2	71	1.78	0.57	20.35	13.06	8.56	0.97	8.81	3	2	0	0	0	0
208	0	0	2	56	2.53	1.72	9.1	5.71	9.22	2.98	4.82	2	2	0	0	0	1
210	0	0	1	69	3.29	1.26	7.3	3.01	14.44	0.89	4.18	2	2	0	0	0	0
212	0	0	2	66	5.32	1.25	6.56	4.1	7.24	0.74	1.95	3	2	0	0	0	0
213	0	0	1	66	1.69	3.56	0.6	0.5	11.46	3.55	1.03	3	2	0	0	0	0
218	0	0	1	71	96.43	1.19	16.62	6.63	7.42	0.72	8.28	5	2	1	1	1	1
219	0	0	1	63	2.31	2.1	13.84	5.32	8.46	0.94	5.18	1	2	2	0	1	0
222	0	0	2	66	3.03	1.39	7.07	3.26	9.19	1.06	3.23	2	2	2	1	1	0
239	0	0	1	46	1.53	1.37	7.88	4.04	8.57	1.33	4.1	2	2	0	1	0	0
242	0	0	1	61	1.39	1.49	3.79	3.38	6.74	1.38	4.25	2	2	0	0	0	0
244	0	0	1	68	1.39	3.03	9.77	5.36	7.78	0.96	6.6	4	2	1	1	1	1
245	0	0	1	63	1.89	5.9	38.08	16.83	10.11	1.1	8.54	5	2	1	0	1	0
248	0	0	1	61	2.3	1.35	7.28	3.48	6.95	1.19	9.5	2	2	0	0	0	0
250	0	0	2	43	4.49	0.53	13.45	7.21	17.64	4.78	4.53	2	2	1	0	0	0
254	0	0	1	49	3.29	2.22	6.81	3.35	11.4	2.81	2.75	4	2	2	0	1	0
256	0	0	1	50	2.08	4	60.01	18.34	19.71	1.2	31.95	2	2	0	0	0	0
259	0	0	1	81	5.18	5.63	19.17	7.16	10.83	1.44	4.36	5	2	0	0	0	0
260	0	0	1	52	5.16	2.21	5.47	2.92	10.26	300	2.58	4	2	1	0	1	1
263	0	0	1	76	1.9	5.45	130.1	20.74	24.3	16.23	34.74	4	2	2	1	1	1
265	0	0	2	57	4.12	1.58	5.44	2.91	13.61	0.69	3.73	3	2	0	1	0	0
268	0	0	1	73	1.3	2.38	16.68	4.94	10.05	1.22	4.77	10	2	1	0	1	0
274	0	0	2	70	3.53	1.25	4.57	3.36	6.97	1.87	2.58	2	2	0	0	0	0
286	0	0	1	62	4.32	8.15	9.56	2.86	20.18	5.14	3.75	3	2	0	1	0	0
288	0	0	1	61	2.37	3.86	14.73	4.79	12.82	3.54	5.52	4	2	0	0	0	0
291	0	0	1	69	3.13	3.01	16.38	8	17.53	1.65	3.46	6	2	0	0	0	0
293	0	0	2	59	3.43	1.31	6.53	3.13	10.02	1.51	2.66	3	2	0	0	0	0
297	0	0	2	79	2.04	1.64	16.84	5.19	17.94	2.14	6.39	3	2	0	0	0	0
298	0	0	2	45	3.53	0.92	11.31	5	33.99	1.66	6.56	1.5	2	0	0	0	0
307	0	0	1	51	2.33	4.25	6.12	2.87	5.4	2.04	4.5	3.5	2	0	1	0	0
308	0	0	2	69	0.61	3.07	40.35	15.77	12.49	1.01	14.28	5	2	0	0	0	0
310	0	0	2	48	4.49	1.2	5.61	2.62	19.8	2.18	3.23	3	2	1	0	1	1
311	0	0	1	72	1.04	1.79	11.68	6.83	35.75	6.67	5.12	5	2	0	1	0	0
312	0	0	2	52	5.14	1.36	6.93	2.51	13.13	3.38	4.43	2	2	0	1	0	0
313	0	0	1	67	3.31	3.4	11	3.6	5.56	1.94	5.47	3	2	1	0	1	1
315	0	0	1	73	2.31	2.38	7.49	2.05	15.8	1.75	3.65	2	2	0	0	0	0
321	0	0	1	64	4.05	2.4	0.6	0.5	12.17	1.17	1.3	1	2	1	0	1	0
324	0	0	1	45	4.72	0.56	5.5	3.41	6.36	4.66	3.28	2	2	0	1	0	1
327	0	0	1	63	2.35	2.57	7.82	3.48	15.22	3.29	2.72	2	2	1	0	1	0
330	0	0	1	65	2.2	3.48	8.44	4.41	24.99	5.58	4.05	2	2	0	1	0	1
331	0	0	1	48	3.48	2.26	10.23	5.22	6.29	3.41	2.43	2	2	0	0	0	0
337	0	0	2	61	4.9	1.82	34.56	12.13	10.13	9.42	15.09	1	2	0	0	0	1
339	0	0	1	71	2.53	6.96	9.43	4.91	6.58	1.12	4.71	3	2	0	0	0	0
342	0	0	1	67	1.4	0.55	2.44	1.75	14.57	1.06	2.57	4.5	2	1	1	1	0
343	0	0	1	55	1.72	2.75	18.33	6.75	5.94	3.86	4.67	1	2	2	0	1	0
344	0	0	1	75	5.5	8.22	14.44	4.72	14.58	3.75	8.92	2	2	1	1	1	0
348	0	0	1	62	4.28	2.09	5.28	2.62	7.67	1.92	2.23	1	2	0	0	0	1
351	0	0	1	56	2.04	1.49	7.12	2.35	4.04	0.78	5.07	3	2	0	0	0	0
356	0	0	2	61	3.38	0.92	3.7	3.59	10.08	2.95	3.19	1	2	3	1	1	0
365	0	0	1	52	5.29	1.57	8.79	12.63	17.19	1.07	6.44	3	2	0	0	0	1
369	0	0	2	78	3.02	2.52	3.29	3.29	5.48	2.33	0.98	2	2	1	1	1	0
379	0	0	1	68	2.81	2.88	10.85	4.6	18.13	11.24	2.52	3	2	3	1	1	0
380	0	0	2	75	1.4	2.95	9.47	4.67	24.42	18.2	2.82	4	2	1	0	1	0
381	0	0	1	40	5.06	1	552.2	70.98	10.24	8.79	142.9	1	2	0	0	0	0
385	0	0	1	47	6.33	0.54	5.32	3.11	7.34	2.07	5.4	1.5	2	1	0	1	0
389	0	0	2	47	1.31	1.19	5.45	2.75	8.47	1.19	1.79	1	2	0	0	0	0
391	0	0	1	68	1.55	3.57	9.74	3.97	66.84	1.78	6.05	2	2	0	0	0	0
394	0	0	1	44	2.08	2.49	6.44	2.55	7.37	29.44	3.02	1	2	1	0	1	0
398	0	0	1	74	2.58	15.72	16.62	4.39	11.24	1.48	6.72	3	2	2	1	1	0
402	0	0	1	70	4.09	1.33	6.92	4.37	5.73	1.21	4.31	2	2	0	1	0	0
406	0	0	1	60	2.85	2.82	12.01	6.15	9.93	4.06	5	3	2	0	1	0	0
408	0	0	1	52	4.64	4.38	7.12	3.56	3.56	1.88	4.42	1	2	0	0	0	0
416	0	0	1	36	2.23	2.67	9.62	3.77	13.1	1.72	5.67	4	2	0	0	0	0
417	0	0	1	58	3.82	1.88	3.44	2.16	13.47	0.8	3.59	3	2	0	0	0	0
418	0	0	1	68	4.3	6.34	37.69	12.46	5.74	1.24	6.39	3	2	0	0	0	0
422	0	0	1	55	1.86	1.93	0.6	1.53	10.74	5.36	2.52	8	2	0	0	0	0
425	0	0	1	66	1.48	2.24	10.23	4.63	9.44	1.31	4.37	3	2	0	1	0	0
427	0	0	2	48	9.63	9.45	6.58	2.96	82.08	1.04	0.89	3	2	2	1	1	0
430	0	0	1	66	2.22	3.3	9.81	3.67	11.51	1.13	3.49	1.5	2	0	0	0	0
432	0	0	2	36	3.65	0.83	10.73	3.92	29.78	3.84	3.58	12	2	3	1	1	1
434	0	0	1	63	1.35	3.77	6.77	3.15	13.38	1.42	0.59	4	2	0	0	0	0
437	0	0	1	69	0.98	4.01	125.9	26.96	9.9	2.31	46.52	2	2	2	1	1	1
438	0	0	2	51	5.04	5.04	34.44	11.28	13.16	0.83	11.29	8	2	2	1	1	1
440	0	0	1	57	4.85	9.27	16.78	5.45	5.35	2.09	5.73	3	2	0	1	0	1
443	0	0	2	56	2.29	2.37	3.87	2.45	7.38	6.52	2.56	3	2	2	1	1	0
451	0	0	1	63	2.04	1.73	12.04	4.68	5.27	0.79	5.06	2	2	0	0	0	0
452	0	0	2	60	2.27	0.71	5.75	2.64	9.74	1.26	2.65	1	2	0	1	0	0
454	0	0	1	64	1.81	4.06	22.14	8.27	16.77	12.37	7.19	4	2	0	0	0	0
458	0	0	1	74	3.05	4.3	16.13	5.27	14.7	1.13	8.64	5	2	0	0	0	1
460	0	0	2	48	1.79	2.28	6.39	3.1	8.66	0.77	3.93	3	2	2	1	1	0
461	0	0	1	61	1.5	2.8	13.81	3.77	8.78	1.24	5.25	4	2	0	0	0	0
464	0	0	1	65	3.54	1.34	4.86	3.9	3.87	14.56	3.37	2.5	2	0	0	0	0
465	0	0	1	52	6.83	1.52	4.38	2.7	14	1.02	2.66	3	2	0	0	0	0
467	0	0	2	55	2.64	0.62	6.56	3.22	7.84	3.03	5.24	1	2	0	0	0	0
469	0	0	1	60	3630	4.97	14.86	14.86	16.64	16.64	16.64	2	2	2	1	1	0
472	0	0	1	55	1.93	1.83	8.02	1.64	8.63	1.36	5.58	4	2	1	1	1	0
485	0	0	1	30	3.25	0.83	2.65	2.49	8.02	3.09	3.15	1	2	2	0	1	0
487	0	0	1	61	2.29	2.04	9.75	5.47	5.6	1.13	5.27	1	2	0	0	0	0
490	0	0	2	68	3.88	1.55	7.13	3.68	5.43	4.93	3.51	2	2	0	0	0	0
496	0	0	1	67	0.79	1.28	5.8	3.77	8.08	1.62	3.86	2.5	2	0	1	0	0
498	0	0	1	63	2.37	1.84	16.8	6.73	12.51	0.94	7.82	4	2	0	0	0	0
499	0	0	1	66	3.64	3.16	26.72	7.75	5.22	1.09	10.47	5	2	2	1	1	0
501	0	0	1	78	3.37	1.58	6.41	3.79	25.71	5.75	2.22	3	2	0	0	0	0
511	0	0	1	77	2.18	4.65	22.06	8.19	7.31	1.35	8.56	3	2	0	0	0	0
515	0	0	1	59	2.08	3.32	7.42	3.73	4.68	1.04	2.88	1	2	0	0	0	0
517	0	0	2	71	1.79	1.98	18.63	7.24	11.08	11.26	7.35	5	2	0	0	0	0
519	0	0	1	48	1.57	4.51	0.97	0.97	19.74	1.13	1.62	4	2	1	1	1	0
528	0	0	2	56	1.12	1.78	30.67	11.24	10.09	1.41	16.88	2	2	2	0	1	0
529	0	0	2	72	1.76	1.42	7.16	3.6	10.5	0.83	3.21	3	2	0	0	0	0
530	0	0	2	75	2.89	1.53	9.31	4.05	8.22	1.58	4.02	2	2	1	0	1	0
531	0	0	1	62	2.75	5.66	21.08	6.86	21.47	6.4	9.11	2	2	0	0	0	0
532	0	0	1	70	2.05	1.6	4.94	2.6	5.51	1.13	3.07	3	2	0	0	0	0
534	0	0	1	51	3.28	1.32	7.22	2.17	11.34	1.06	2.08	3	2	0	0	0	0
543	0	0	2	70	3.24	1.41	15.02	5.95	13.95	2.33	10.52	2	2	0	1	0	0
544	0	0	1	41	2.24	1.88	15.48	5.26	6.68	0.78	10.85	1.5	2	0	0	0	1
548	0	0	1	61	1.6	3.83	26.47	11.66	9.63	0.96	13.65	5	2	0	1	0	0
554	0	0	1	55	2.59	3.16	4.95	3.14	9.72	2.05	4.52	4	2	0	1	0	1
559	0	0	1	40	1.63	1.61	17.87	7.42	7.5	2.86	6.04	4	2	0	0	0	0
568	0	0	2	64	1.77	2.12	10.58	3.27	10.26	28.66	3.64	2	2	0	0	0	0
569	0	0	2	42	3.43	0.54	4.51	1.44	15.66	0.39	1.67	1.5	2	1	0	1	1
582	0	0	2	46	0.86	1.05	17.81	6.03	12.69	1.03	6.79	1	2	0	0	0	1
586	0	0	2	63	1.92	3.05	13.66	4.09	10.2	1.97	7.05	2.5	2	1	0	1	0
588	0	0	1	59	2.37	1.83	12.32	3.21	3.84	1.77	7.79	5	2	0	1	0	0
590	0	0	1	45	1.67	2.09	16.13	4.73	6.17	1.54	5.99	2	2	0	0	0	0
591	0	0	1	56	2.82	3.21	29.5	14.39	5.64	0.8	8.06	2	2	0	0	0	0
593	0	0	2	54	1.62	1.73	6.29	2.41	9.88	2.27	2.5	1	2	0	0	0	0
594	0	0	2	69	1.19	0.73	10.1	2.96	7.58	1.03	3.19	4	2	0	0	0	1
595	0	0	1	69	2.52	2.19	13.1	9.85	8.41	0.97	2.01	5	2	1	1	1	0
596	0	0	1	59	1.95	2.45	5.35	0.78	11.2	1.76	2.41	2	2	0	0	0	0
597	0	0	2	55	2.09	1.57	38.71	21.67	4.39	0.97	5.9	4	2	0	0	0	0
600	0	0	1	73	1.8	5.86	28.56	9.92	12.87	1.14	10.81	4	2	0	0	0	0
601	0	0	1	72	2.11	1.82	13.83	4.31	13.24	1.78	4.59	2	2	1	1	1	0
602	0	0	1	59	3.02	2.08	6.86	1.87	10.6	5.27	2.58	10	2	0	0	0	0
604	0	0	2	75	1.2	2.3	11.38	2.92	16.05	16.05	3.31	2	2	0	0	0	0
606	0	0	2	79	1	3.08	10.84	4.59	6.42	22.47	2.53	1	2	0	0	0	0
607	0	0	1	58	1.9	2.67	19.64	10.91	4.54	0.65	1.65	4	2	0	0	0	0
612	0	0	2	61	6.44	1.06	5.81	1.62	7.29	6.1	2.3	3	2	0	1	0	1
616	0	0	2	46	1.05	0.97	14.26	4.08	15.05	0.22	6.61	3	2	2	1	1	0
618	0	0	1	66	1.92	4.12	21.47	9.57	5.4	13.21	6.53	2	2	0	0	0	1
624	0	0	2	40	2.36	2.27	12.12	3.42	13.32	1.1	8.74	1	2	3	1	1	1
625	0	0	2	63	1.29	0.77	5.42	2.13	10.36	1.88	3.86	4	2	0	1	0	0
628	0	0	1	60	1.05	3.7	13.29	3.2	6.17	1.72	3.65	2	2	0	0	0	0
642	0	0	1	53	3.75	2.44	4.82	1.99	6.63	2.25	3.19	3.5	2	0	0	0	0
643	0	0	1	55	1.54	1.1	7.88	1.94	6.95	2.63	4.74	5	2	2	1	1	0
645	0	0	1	67	2.23	2.38	5.32	0.73	3.95	0.73	2.86	5	2	0	0	0	0
646	0	0	1	65	3.56	5.69	21.29	9.09	12.39	4.05	5.82	3	2	0	0	0	0
649	0	0	1	55	6.7	2.45	13.78	3.99	11.37	0.72	6.4	1	2	0	0	0	0
652	0	0	1	50	3.35	1.84	9.89	3.98	6.08	1.28	4.11	3	2	0	1	0	1
657	0	0	1	76	2.72	0.83	10.36	4.05	4	1.68	3.58	1.5	2	0	1	0	0
658	0	0	1	48	1.78	1.67	4.87	0.85	5.84	0.2	3.36	2	2	0	0	0	0
659	0	0	1	58	1.72	2.12	35.87	14.32	16.31	0.84	13.55	2	2	0	0	0	0
660	0	0	2	30	3.12	1.13	4.96	2.5	27.32	1.87	2.62	3	2	0	0	0	0
661	0	0	1	67	3.78	1.58	2.49	1.84	7	5.53	3.13	2	2	0	0	0	0
662	0	0	1	45	3.03	1.04	3.83	1.76	7.47	0.66	3.28	2	2	0	0	0	0
663	0	0	1	64	5.88	15.46	11.38	5.78	4.48	0.24	4.28	5	2	0	0	0	0
1136	0	1	1	73	3.62	4.11	10.28	4.35		1.1	4.43	2.5	2	0	0	0	0
41	0	0	2	37	1.85	1.47	11.96	4.15	9.02	5.19	4.47	5	3	3	1	1	1
58	0	0	1	52	2.17	4.99	12.6	5.98	6.79	0.62	8.03	3.5	3	0	1	0	0
61	0	0	1	59	1.37	3.81	15.32	5.62	14.75	0.64	8.57	4	3	0	0	0	0
72	0	0	1	63	541.2	1.53	0.6	1.2	11.44	3.02	0.84	2.5	3	0	0	0	1
76	0	0	1	66	100.1	1.64	6.69	4.57	12.8	2.05	2.07	3.5	3	0	0	0	1
86	0	0	1	55	2.66	6.74	0.6	1.38	11.44	8.8	1.28	2	3	1	1	1	1
99	0	0	1	54	1.53	0.79	5.27	2.71	11.59	0.62	4.04	5	3	0	0	0	0
101	0	0	1	72	4	1.9	13.94	6.56	15.8	5.19	4.45	3	3	1	1	1	1
109	0	0	2	75	3.24	1.97	7.02	3.4	12.71	2.26	3.31	4	3	0	0	0	0
120	0	0	2	53	1.57	0.52	21.46	11.22	9.65	7.93	12.28	4	3	2	1	1	0
121	0	0	1	54	1.39	1.67	3.67	4.3	6.82	3.06	1.77	2.3	3	0	0	0	0
123	0	0	1	51	2.16	18.42	1000	112.4	24.65	1.57	200	3	3	0	0	0	0
129	0	0	1	56	4.67	2.3	3.87	2.8	21.99	1.34	2.2	2.5	3	2	0	0	0
132	0	0	1	70	4.93	0.95	9.37	4.83	13.8	0.74	2.28	5	3	0	0	0	0
135	0	0	1	51	4.08	1.78	31.84	8.38	12.59	0.99	15.16	3.5	3	0	0	0	0
141	0	0	1	73	1.48	3.01	1.2	1.43	15.18	7.73	1.47	4	3	0	1	0	0
142	0	0	2	68	2.87	1.31	17.72	9.52	12.12	0.87	6.34	1.2	3	3	1	1	1
143	0	0	1	43	2.69	1.83	167.1	33.67	11.21	7.38	9.27	2	3	2	1	1	1
144	0	0	1	46	3.55	1.71	0.6	0.69	12.52	1.69	0.94	3.5	3	1	0	1	0
148	0	0	1	40	2.46	5.46	0.6	0.5	12.11	0.74	1	3	3	2	1	1	0
150	0	0	1	70	2.95	3.16	21.1	7.73	10.79	1.05	7.54	1.7	3	0	0	0	0
152	0	0	1	65	1.42	27.79	82.38	13.38	25.1	300	34.5	4	3	0	0	0	0
157	0	0	1	64	3.16	2.66	81.84	11.95	11.91	7.47	26.05	5	3	3	1	1	1
158	0	0	1	65	2.41	2.62	5.06	1.3	4.28	4.44	1.8	3	3	2	0	1	0
159	0	0	1	60	3.2	4.06	4.19	3.07	7.52	1.8	4.07	6	3	0	1	0	1
162	0	0	2	71	1.05	2.29	11.55	3.58	12.54	3.14	3.53	5	3	0	0	0	0
163	0	0	2	38	4.83	2.23	13	4.77	14.25	16.71	2.68	2	3	0	1	0	1
164	0	0	1	72	2.64	2.91	23.71	6.99	6.42	0.96	9.56	6	3	3	0	1	1
173	0	0	1	65	5.38	3.31	3.44	3.87	5.35	4.18	1.13	5	3	2	0	1	0
174	0	0	1	58	3.42	2.04	4.78	4.19	4.96	1.08	2.3	4.5	3	0	1	0	1
175	0	0	1	26	2.57	1.29	5.44	2.82	7.72	5.28	2.07	4	3	1	0	1	1
176	0	0	1	44	5.01	0.75	16.98	6.07	15.45	2.07	3.4	6	3	2	1	1	1
178	0	0	1	61	4.32	3.93	217.5	57.17	10.44	2.5	12.49	2	3	2	1	1	1
185	0	0	1	53	2.09	1.35	30.03	5.79	5.03	3.09	23.7	5	3	2	1	1	1
187	0	0	1	62	2.27	3.35	7.02	2.59	9.77	18.11	3.51	6	3	2	1	1	1
188	0	0	2	54	2.83	1.72	8.96	2.68	7.53	1.68	3.58	2	3	0	0	0	1
193	0	0	1	50	4.51	2.35	21.89	10.02	7.47	1.33	5.72	4.5	3	1	1	1	0
195	0	0	1	62	1.64	2.58	55.99	17.13	12.62	0.93	31.17	5	3	2	1	1	1
196	0	0	1	72	2.93	1.51	14.29	7.15	12.12	9.54	5.07	6	3	2	1	1	1
199	0	0	2	37	0.86	0.64	8.52	3.7	25.82	1.38	3.6	8	3	0	0	0	1
200	0	0	1	43	3.01	1.48	9.91	2.88	57.73	0.72	4.2	8	3	3	0	1	1
202	0	0	1	72	2.65	1.72	27.49	12.06	22.21	5.6	5.6	5	3	2	1	1	1
206	0	0	1	66	17.41	4.11	7.5	3.49	6.83	0.74	4.39	5	3	1	1	1	0
207	0	0	1	69	2.43	3.03	11.88	5.37	9.06	4.48	4.3	4	3	2	1	1	1
215	0	0	1	49	2.32	4.99	5.16	2.58	15.03	1.17	1.73	2	3	0	0	0	1
217	0	0	2	67	2.31	1.35	28.39	8.48	110.1	50.17	9.71	5	3	2	1	1	1
221	0	0	1	66	7.63	4.81	20.13	7.54	6.89	7.75	8.11	3	3	0	1	0	0
226	0	0	1	53	1.84	3.83	5.57	2.57	3.46	2.65	3.58	6	3	2	0	1	0
229	0	0	1	77	3.28	7.47	112.3	45.28	21.62	1.07	12.25	5	3	0	1	0	0
230	0	0	1	76	2.13	2.71	0.6	0.5	11.06	1.44	1.12	3	3	0	0	0	1
234	0	0	1	37	2.55	2.1	15.61	9.9	8.64	0.71	5.87	5	3	2	0	1	1
235	0	0	1	66	2.85	0.52	15.98	4.33	5.56	1.34	7.51	7	3	2	1	1	0
240	0	0	1	61	2.29	4.14	23.37	7.9	18.54	0.86	12.8	4	3	2	1	1	1
249	0	0	1	62	5.46	1.72	0.6	0.56	7.34	1.53	1.67	6	3	2	1	1	1
251	0	0	1	40	2.88	0.78	3.45	2.17	11.51	2.91	1.42	2	3	3	1	1	1
255	0	0	2	65	1.5	1.82	4.6	3.3	6.92	0.76	2.77	5	3	3	0	1	1
257	0	0	1	63	2.39	2.94	2.94	3.8	6.06	1.01	2.47	5	3	0	0	0	1
262	0	0	2	65	7.89	0.85	4.92	2.72	13.73	1.75	2.3	4	3	0	0	0	0
273	0	0	2	42	1.96	0.97	6.25	2.87	15.28	0.6	2.51	5	3	3	0	1	1
275	0	0	1	61	3.21	2.36	0.6	0.5	8.38	10.88	1.58	4	3	1	1	1	1
276	0	0	2	34	8.97	0.36	9.35	4.96	12.18	1.4	4.82	4	3	0	0	0	1
279	0	0	1	34	46.55	1.21	7.35	2.17	10.94	9.05	5.44	10	3	3	1	1	1
282	0	0	1	75	2.29	2.23	8.85	3.53	17.64	1.76	3.15	2	3	0	1	0	1
283	0	0	1	52	1.24	1.24	6.49	3.07	6.18	1.88	3.06	4	3	0	0	0	0
284	0	0	2	64	1.36	0.81	3.14	1.28	16.38	4.71	2.59	6	3	3	1	1	1
285	0	0	1	57	4.05	3.1	5.76	3.32	4.56	1.6	3.99	1	3	0	0	0	0
287	0	0	2	51	1.19	1.92	16.08	5.36	10.12	1.67	3.35	2	3	1	1	1	1
290	0	0	1	59	3.23	6.7	20.38	6.4	8.84	6.74	10.58	6	3	2	0	1	1
292	0	0	1	51	3.13	2.92	28.62	7.58	27.46	2.87	14.65	8	3	3	1	1	1
294	0	0	1	74	2.06	2.04	17.42	9.89	8.58	21.79	3.91	5	3	2	1	1	1
295	0	0	1	59	3.67	3.28	121.9	30.95	19.06	1.25	79.02	8	3	3	1	1	1
296	0	0	1	65	1.78	1.76	27.42	11.86	8.09	2.19	12.02	4	3	3	1	1	1
303	0	0	1	57	3.48	1.11	12.25	4.38	17.38	3.52	5.14	12	3	3	1	1	0
304	0	0	1	65	1.96	2.66	34.65	12.13	15.95	6.88	33.59	6	3	2	1	1	1
305	0	0	2	71	2.34	2.94	0.6	0.72	11.95	2.14	0.7	3	3	1	0	1	0
306	0	0	1	69	4.4	4.8	6.61	1.2	22.17	0.83	1.23	10	3	0	0	0	0
309	0	0	1	74	1.99	1.17	7.31	3.82	6.32	3.55	3.42	2	3	0	0	0	0
314	0	0	2	39	2.06	1.21	18.18	4.34	6.26	6.42	6.23	1	3	3	1	1	1
317	0	0	1	67	1.29	23.15	9.79	4.81	9.76	2.75	5.77	4	3	1	0	1	1
318	0	0	1	53	1.72	1.9	0.6	0.5	8.67	0.91	1.36	5	3	0	0	0	1
319	0	0	1	68	5.49	1.03	3.76	1.93	4.72	0.76	2.36	3	3	1	0	1	1
320	0	0	2	66	2.4	3.75	9.26	4.12	8.54	2.46	5.08	6	3	3	1	1	1
322	0	0	1	53	1.84	0.63	7.9	3.94	5.97	1.37	2.54	4	3	0	1	0	1
323	0	0	1	57	2.35	6.72	5.43	2.77	3.05	6.42	5.04	2	3	0	0	0	0
325	0	0	1	70	2.11	1.4	6.45	2.59	11.61	1.52	3.23	3	3	3	1	1	1
329	0	0	1	30	3.06	2.29	3.37	2.25	7.61	1.57	2.97	2.5	3	0	0	0	0
332	0	0	1	78	4.29	1.29	10.26	3.41	19.74	10.07	10.07	6	3	3	1	1	1
333	0	0	1	58	2.97	1.34	4.62	3.83	8.24	1.52	2.41	2	3	2	1	1	1
334	0	0	2	70	2.49	132	32.48	7.15	20.7	81.74	5.51	8	3	3	1	1	1
335	0	0	2	66	1.93	1.4	5.25	2.28	9.3	1.51	2.98	4	3	3	1	1	1
338	0	0	1	29	2.18	2.02	0.6	0.87	10.5	0.92	1.92	3	3	3	1	1	1
340	0	0	1	66	2.84	3.34	14.82	6.42	20.86	11.57	5.5	5	3	3	1	1	1
341	0	0	1	70	2.53	1.59	9.6	5.8	17.97	4.52	7.39	6	3	0	0	0	0
347	0	0	1	55	1.64	3.84	112.5	24.12	10.5	3.23	11.15	7	3	2	1	1	1
349	0	0	2	73	3.18	2.45	9.25	2.77	7.24	1.61	2.15	1	3	2	1	1	1
350	0	0	1	55	3.07	8.36	0.6	0.57	8.79	5.14	1.73	5	3	0	0	0	1
353	0	0	1	59	1.71	1.18	1000	500	13.39	11.58	200	5	3	2	1	1	1
354	0	0	1	59	1.84	0.77	5.67	3.33	11.64	1.88	3.34	3	3	1	1	1	0
357	0	0	2	65	3.68	2.04	13.35	5.22	13.41	1.01	5.79	4	3	0	1	0	1
358	0	0	1	74	2.68	2.61	4.16	1.99	9.29	1.04	1.96	3	3	0	0	0	1
359	0	0	1	47	1.17	0.6	2.81	1.12	19.49	1	1.5	5	3	0	1	0	1
360	0	0	1	49	2.99	2.12	5.76	3.02	14.58	6.18	4.39	1	3	0	0	0	1
361	0	0	1	68	1.28	2.1	7.12	3.37	5.95	56.72	3.68	3	3	3	1	1	1
362	0	0	2	68	1.31	1.18	16.08	5.05	11.7	1.68	11.24	6	3	0	0	0	1
363	0	0	2	66	1.84	0.84	148	31.83	8.08	6.71	121.9	5	3	2	1	1	1
364	0	0	1	55	12.32	18.38	155.2	32.45	11.86	1.26	79.91	4	3	2	1	1	0
375	0	0	1	68	5.7	3.21	0.6	0.5	20.09	2.78	1.11	4	3	2	1	1	1
376	0	0	1	45	1.46	7.6	40.31	10.56	11.29	2.81	16.94	2.5	3	1	1	1	0
378	0	0	2	54	2.14	0.54	3.14	2.49	8.33	1.46	2.03	4.5	3	1	1	1	1
384	0	0	1	58	1.38	1	2.71	1.85	9.16	1.87	2.29	4	3	1	0	1	1
387	0	0	1	68	3.27	16.52	10.15	3.21	9.81	8.7	3.83	5	3	1	1	1	0
388	0	0	1	68	2.62	2.55	22.99	7.32	13.48	2.76	7.31	8	3	2	1	1	1
390	0	0	2	68	3630	2.4	9.51	4.21	6.84	1.87	3.29	6	3	2	0	1	0
396	0	0	1	52	2.29	1.24	7.53	2.5	5.16	15.99	3.38	5	3	1	1	1	1
399	0	0	2	56	1.12	0.7	8.53	3.1	9.14	4.65	2.05	4	3	3	1	1	1
400	0	0	1	63	1.67	1.49	7.87	4.11	8.85	1.13	7.15	3	3	1	0	1	0
403	0	0	2	70	2.54	2.78	5.3	3.2	17.75	1.28	2.88	3	3	1	1	1	1
404	0	0	2	35	2.44	0.72	10.12	4.95	8.63	2.58	5.1	8	3	3	1	1	1
407	0	0	1	65	2.69	0.88	5.41	4.48	9.57	2.07	3.86	2	3	0	0	0	1
409	0	0	1	63	1.07	4.48	8.12	4.73	6.64	1.07	4.84	3	3	1	0	1	0
413	0	0	2	67	1.7	1.13	19.98	10.33	18.22	1.11	5.7	10	3	3	1	1	1
419	0	0	1	81	4.7	3.86	0.6	0.54	11.41	64.71	2.1	6	3	0	0	0	1
421	0	0	1	48	2.75	0.58	10.94	4.43	10.65	1.11	4.4	4	3	0	1	0	1
424	0	0	1	70	3.1	1.61	0.6	0.9	11.37	4.51	2.06	5	3	2	1	1	1
426	0	0	1	66	1.42	5.39	144.7	36.74	7.52	5.04	81.8	8	3	3	1	1	1
428	0	0	1	59	2.33	2.92	54.6	15.4	9.24	7.23	11.07	5	3	2	1	1	1
429	0	0	1	43	1.87	1.35	3.4	2.37	11.6	2.16	1.97	15	3	3	1	1	1
431	0	0	2	65	4.83	2.75	10.76	5.17	7.73	1.5	3.73	5	3	2	1	1	1
433	0	0	1	66	2.87	1.88	8.34	3.73	8.08	1.44	0.9	4	3	2	1	1	0
435	0	0	1	65	3.11	5.32	10.53	3.17	6.61	1.09	4.54	2	3	1	1	1	1
441	0	0	1	54	4.63	0.62	17.31	5.35	5.63	1.88	10.11	5.5	3	3	1	1	1
442	0	0	2	46	1.75	2.53	1.48	0.5	8.17	0.91	1.45	2	3	0	0	0	1
444	0	0	1	65	2.73	7.78	4.13	1.49	16.59	1.95	2.2	5	3	0	0	0	1
445	0	0	2	60	1.89	91.67	1000	468.9	60.18	4.58	200	6	3	2	1	1	0
446	0	0	2	55	3.97	2.96	5.5	1.92	14.48	22.37	3.19	5	3	0	1	0	1
447	0	0	1	83	3.17	7.19	25.83	11.02	8.78	8.7	7.44	6	3	3	1	1	1
449	0	0	2	64	2.69	0.84	8.03	3.72	11.61	2.4	2.81	4	3	3	1	1	0
450	0	0	1	70	2.42	1.89	210.7	48.68	13.53	1.86	81.95	3	3	0	1	0	1
453	0	0	1	42	1.71	3.6	8.77	3.44	13.96	0.99	5.97	4	3	2	1	1	1
456	0	0	1	72	3.67	4.79	0.6	0.5	11.72	2.05	1.44	4.5	3	0	0	0	1
457	0	0	1	66	1.76	1.6	9.3	2.92	10.49	0.81	3.22	4	3	1	1	1	0
462	0	0	2	57	3.44	2.12	5.51	2.77	6.1	1.63	3.99	5	3	1	1	1	0
466	0	0	2	60	2.03	2.14	24.14	10.26	47.01	4.39	6.2	1.5	3	0	0	0
470	0	0	1	74	2.19	5.24	6.78	0.7	6.94	7.66	4.26	4	3	1	0	1	0
474	0	0	2	41	2.54	0.89	9.5	5.46	13.04	1.36	3.69	2	3	0	0	0	1
475	0	0	2	69	0.89	2.74	12.18	6.96	20.37	1.01	4.14	3	3	1	1	1	1
476	0	0	1	48	1.14	1.51	2.2	2.25	5.83	0.85	1.76	13	3	3	1	1	1
477	0	0	2	47	1.35	16.37	6.12	3.21	12.79	24.05	3.15	5.5	3	1	1	1	0
479	0	0	1	43	1.95	1.06	10.33	4.68	18.5	1.32	4.9	10	3	0	0	0	0
480	0	0	2	41	1.51	1.43	5.99	3.94	4.4	4.52	3.83	8	3	1	0	1	1
481	0	0	1	54	4.19	1.25	0.6	1.02	5.74	1.05	1.56	5	3	0	0	0	0
482	0	0	1	71	3.46	3.19	16.26	5.75	16.79	1.85	6.18	5	3	2	1	1	0
486	0	0	1	70	2.17	2.08	6.25	3.7	6.75	1.38	4.36	3	3	2	1	1	1
489	0	0	1	46	4.51	2.15	4.61	2.59	4.83	1.05	4.77	4	3	0	0	0	1
492	0	0	1	51	3.9	1.76	5.49	3.13	5.98	0.84	4.84	3	3	3	1	1	1
493	0	0	1	65	2.01	3.93	21.48	7.41	10.37	0.99	7.81	5	3	0	0	0	0
494	0	0	1	67	1.62	2.78	22.42	7.79	14.87	0.51	8.32	3	3	3	1	1	1
495	0	0	1	64	15.43	34.26	7.86	4.31	5.34	4.47	5.9	5	3	2	1	1	0
497	0	0	1	48	1.5	2.51	18.4	4.29	12.18	4	6.58	5	3	0	0	0	0
502	0	0	1	59	3.3	3.75	0.6	0.64	18.7	0.77	1.75	6	3	2	1	1	1
505	0	0	1	69	1.42	3.69	0.6	1.43	16.64	30.12	2.36	7	3	0	0	0	0
506	0	0	1	63	6.07	2.19	20.32	5.67	6.34	2.77	13.65	5	3	3	1	1	0
507	0	0	1	59	2.78	2.96	16.24	4.18	5.55	9.3	7.31	5	3	0	1	0	1
508	0	0	2	46	3.49	26.43	7.3	2.58	20.23	124.8	2.85	6	3	3	1	1	0
512	0	0	1	51	4.08	1.81	3.68	1.71	8.51	2.02	2.45	1.5	3	0	0	0	0
513	0	0	1	69	1.37	4.74	1000	246.2	17.12	1	200	3	3	1	0	1	1
516	0	0	1	55	1.5	1.81	5.27	2.37	10.25	4.47	1.28	4	3	3	1	1	0
520	0	0	2	71	60.56	5.87	52.86	14.74	11.45	4.93	24.92	7	3	0	0	0	0
522	0	0	1	69	2.93	4.07	7.25	4.16	3.7	1.9	4.93	4	3	3	1	1	1
523	0	0	1	74	1.62	2.64	41.71	17.29	9.12	1.9	11.34	5	3	1	1	1	0
526	0	0	1	66	1.73	1.29	6.4	2.81	4.1	12.28	3.19	7	3	3	1	1	1
533	0	0	2	65	1.45	2.46	0.98	0.61	17.15	1.18	0.5	4	3	3	1	1	0
536	0	0	1	63	4.17	2.64	8.04	3.78	9.22	2.55	3.56	4	3	0	1	0	1
537	0	0	1	58	3.73	2.57	14.69	5.47	11.12	1.3	7.68	1	3	0	0	0	1
538	0	0	2	46	8.79	2.53	8.93	4.4	9.58	4.18	4.39	6	3	2	1	0	0
539	0	0	1	64	1.12	7.06	29.93	7.61	11.49	4.28	19.17	4	3	1	1	1	1
540	0	0	1	58	3.26	1.79	7.37	4.58	18.09	3.66	3.44	5	3	0	1	0	1
547	0	0	2	65	1.69	1.73	14.84	5.18	20.23	2.47	8.94	8	3	2	1	1	1
549	0	0	1	31	1.74	0.72	9.79	3.18	8.64	0.86	5.84	5	3	0	0	0	1
550	0	0	1	64	2.89	3.07	177.1	35.27	10.91	2.15	116.9	5	3	2	1	1	1
551	0	0	1	50	2.46	1.79	11.26	3.07	8.28	0.86	7.04	6	3	0	1	0	1
552	0	0	1	63	2.22	2.48	8.24	1.87	6.7	3.43	4.21	3	3	1	1	1	1
556	0	0	2	48	3.03	0.72	5.42	0.5	11.32	3.03	1.78	5	3	3	1	1	1
557	0	0	1	56	6.01	5.32	14.92	4.86	15.34	15.35	8.03	8	3	3	1	1	0
558	0	0	1	65	4.24	2.38	122.2	23.32	8.14	1.33	80.66	3	3	1	0	1	0
560	0	0	1	63	1.13	1.62	8.06	2.97	7.15	1.28	2.07	8	3	0	0	0	1
561	0	0	1	67	7.08	1.74	17.06	5.89	11.11	8.86	4.26	5	3	0	1	0	1
567	0	0	1	63	0.68	8.07	228.5	47.14	21.11	12.2	90.07	10	3	3	1	1	1
571	0	0	2	55	1.8	6.4	14.76	2.71	8.64	1.08	6.76	4	3	0	1	0	0
572	0	0	2	79	1.32	1.68	17.57	5.68	20.65	2	4.22	5	3	1	0	1	1
573	0	0	2	44	3.36	1.05	51.25	11.93	11.09	34.57	12.51	10	3	3	1	1	1
574	0	0	2	71	3.48	23.93	0.6	0.5	48.68	1.14	0.93	6	3	3	1	1	1
575	0	0	2	64	2.38	2.84	28.49	7.27	6.68	3.42	12.42	4	3	3	1	1	1
579	0	0	1	72	1.68	5.35	123.6	35.12	11.81	0.83	38.43	5	3	1	1	1	1
580	0	0	2	40	1.48	1.53	15.03	5.78	19.31	1.2	4.72	6	3	3	1	1	0
581	0	0	2	57	5.09	1.51	11.64	2.61	6.6	3.05	3.74	4	3	3	1	1	1
583	0	0	1	64	3.43	2.79	9.03	9.03	11.2	20.6	4.6	3	3	1	1	1	1
584	0	0	2	71	4.16	2.81	97.18	19.65	17.67	10.35	52.69	5	3	3	1	1	0
585	0	0	1	66	1.71	1.99	10.74	3.75	4.28	0.55	4.47	8	3	3	1	1	1
587	0	0	2	54	40.25	2.54	9.41	5.33	8.74	6.72	5.35	7	3	2	1	1	0
589	0	0	1	47	3.44	2	7.05	1.74	9.17	4.16	2.24	2	3	2	1	1	1
592	0	0	1	69	7.28	2.22	7.59	2.32	19.75	1.05	3.27	7	3	2	1	1	1
598	0	0	1	61	1.98	14.23	12.36	4.21	8.48	7.38	3.18	4	3	1	1	1	1
605	0	0	1	53	2.36	10.45	0.6	0.5	8.57	1.01	1.24	5	3	3	0	1	0
610	0	0	1	63	1.79	3.86	90.13	22.75	15.56	2.04	61.13	3	3	1	1	1	1
613	0	0	1	54	5	3.99	0.6	0.5	6.69	6.14	0.5	6	3	3	1	1	1
614	0	0	1	62	2.56	7.13	0.6	0.5	12.66	1.98	0.5	5	3	0	0	0	1
615	0	0	2	45	2.22	2.52	24.07	8.85	15.63	0.9	14.59	5	3	3	1	1	1
617	0	0	1	53	5.51	1.47	5.75	2.29	8.97	4.45	1.08	10	3	3	1	1	0
619	0	0	2	56	3.86	1.66	23.38	6.23	8.62	25.26	28.81	8	3	2	1	1	0
627	0	0	1	67	0.85	2.38	137.9	54.7	9.25	0.92	25.45	6	3	3	1	1	1
629	0	0	2	47	3.29	1.55	4.91	2.34	9.33	7.75	2.12	7	3	1	1	1	1
630	0	0	2	71	2.48	2.66	0.6	0.5	27.08	0.85	0.72	4	3	3	1	1	1
631	0	0	1	85	1.61	4.16	91.57	24.87	33.58	16.85	21.78	10	3	2	1	1	1
632	0	0	2	63	2.3	0.86	3.36	1.52	8.41	2.6	3.06	5	3	0	0	0	1
633	0	0	2	61	7.54	28.97	0.6	0.5	17.86	2.84	0.74	1	3	3	1	1	1
635	0	0	2	76	2.2	3.21	3.72	0.5	14.8	1.08	2.54	4	3	0	0	0	0
639	0	0	1	60	2.98	2.03	0.6	0.5	9.67	1.41	2.26	4	3	3	1	1	1
640	0	0	1	64	3	2.94	577.7	87.64	14.92	1.54	177.8	3	3	1	1	1	1
641	0	0	1	61	1.34	2.65	0.6	0.5	10.64	7.95	1.91	4	3	1	0	1	1
644	0	0	1	53	2.28	2.15	21.59	9.1	11.67	2.98	7.11	5	3	3	1	1	0
647	0	0	2	79	3.18	50.11	43.15	14.38	90.48	30.9	15.87	6	3	2	1	1	1
654	0	0	2	37	2.4	1.56	27.36	2.53	22.17	0.81	7.46	7	3	3	1	1	1
655	0	0	1	51	2.35	0.71	3.64	0.5	16.42	4.86	3.02	4	3	3	1	1	1
656	0	0	1	67	2.31	6.77	33.12	12.2	9.21	5.53	11.4	5	3	1	0	1	1
664	0	0	1	67	107.6	4.82	23.13	9.86	4.3	1.28	11.12	3	3	2	1	1	0
1145	0	1	1	55	1070	260	826.1	227.16	9.61	7.46	150	1.5	3	3	1	1	0
3	0	0	1	67	3.05	2.61	14.3	6.44	8.7	1.01	4.24	2	4	0	0	0	1
5	0	0	1	50	4.07	1.54	9.88	5.36	2.87	2.59	6.83	5	4	1	1	1	1
9	0	0	2	69	4.94	2.16	4.14	2.5	9.42	0.9	2.39	3	4	1	0	1	1
11	0	0	2	79	3.39	4.9	19.25	13.4	10.49	2.58	6.72	9	4	2	1	1	1
13	0	0	1	54	5.75	2.61	4.6	3.1	6.51	1.24	5.7	2.5	4	3	1	1	1
14	0	0	1	40	1.84	2.94	8.87	5.31	8.49	1.54	2.68	5	4	3	1	1	1
15	0	0	1	47	1.92	2.33	0.6	1.34	11.69	0.82	2.04	7	4	1	1	1	1
16	0	0	2	47	2.54	1.19	7.48	4.47	14.7	2.01	5.67	2	4	3	1	1	1
17	0	0	1	54	0.98	2.81	12.56	6.87	9.92	0.72	12.31	3.5	4	2	1	1	1
18	0	0	1	77	2.83	2.91	111.6	31.58	27.16	1	12.98	3.5	4	2	1	1	1
21	0	0	1	65	3.22	0.98	4.91	3.69	11.81	8.81	3.95	4	4	1	0	1	1
23	0	0	2	30	2.74	1.46	103.6	30.19	28.49	0.77	10	2	4	0	0	0	0
24	0	0	1	49	4.91	1.21	4.86	2.18	11.4	2.06	4.19	2.8	4	0	0	0	0
26	0	0	1	64	4.66	2.57	11.87	5.1	8.22	14.45	6.76	11.5	4	3	1	1	1
28	0	0	2	54	1.38	0.83	4.39	3.71	12.6	1.23	4.55	8	4	3	1	1	1
30	0	0	1	33	2.98	2.15	14.2	7.3	4.63	4.62	6.45	3	4	0	1	0	0
31	0	0	2	61	1.26	0.97	7.33	5.12	7.38	0.67	3.95	2	4	3	1	1	1
32	0	0	1	60	2.83	1.63	8.84	4.56	7.17	1.19	3.65	5	4	3	1	1	1
33	0	0	1	65	3.61	3.35	8.27	2.93	9.11	1.08	3.2	2.8	4	1	0	1	0
34	0	0	1	57	3.85	2.36	14.54	4.7	9.06	1.02	7.64	8	4	3	1	1	1
36	0	0	1	47	4.04	1.79	15.09	6.27	9.37	0.66	10.25	3	4	3	1	1	1
37	0	0	2	71	3.38	113.3	24.25	10.04	59.8	0.81	6.37	4	4	3	1	1	1
38	0	0	2	62	2.31	1.95	13.59	5.5	13.09	1.06	8.21	7	4	3	0	1	0
39	0	0	1	66	2.7	1.47	10.24	5.64	12.78	0.7	5.01	6	4	0	0	0	1
40	0	0	1	54	5.73	8.93	7.8	4.93	12.8	1.03	4.7	3.5	4	2	1	1	1
42	0	0	2	62	2.52	1.65	9.14	4.67	10.09	0.71	3.53	7	4	2	1	1	1
43	0	0	2	43	3.87	2.16	7.87	4.51	22.57	0.86	4.65	2.5	4	2	1	1	0
44	0	0	1	59	2.51	6.61	33.5	10.82	10.58	6.97	13.65	3	4	1	1	1	1
46	0	0	1	74	1.88	1.9	14.2	8.99	4.6	4.7	3.04	4.5	4	2	1	1	0
48	0	0	1	34	2.86	1.05	0.6	0.94	25.63	5.42	1.52	4.5	4	3	1	1	1
49	0	0	2	65	7.28	2.89	14.8	8.29	10.14	0.72	5.36	2	4	2	1	1	0
50	0	0	2	40	2.45	1.95	7.82	4.13	26.25	3.61	6.02	2	4	0	0	0	0
51	0	0	1	66	2.56	4.07	65.4	11.66	10.79	25.3	51.25	5	4	2	0	1	0
56	0	0	1	72	1.86	0.62	18.02	6.53	11.06	4.04	4.53	3	4	2	0	0	1
57	0	0	2	69	4.28	1.68	7.5	4.01	6.06	2.71	2.66	1.5	4	0	0	0	1
59	0	0	1	66	2.04	25.71	206.4	37.19	63.29	2.37	41.99	3	4	2	1	1	1
63	0	0	1	84	2	6.7	179.7	32.04	7.97	44.76	200	4.5	4	1	1	1	1
64	0	0	1	61	4.2	3.37	8.22	5.16	9.17	0.81	2.78	4.5	4	2	0	1	1
65	0	0	1	63	2.95	3.51	0.6	1.39	16.27	1.07	0.89	6	4	0	0	0	1
69	0	0	2	42	1.16	1.02	6.66	4.03	15.53	2.38	2.48	2.2	4	2	1	1	1
70	0	0	2	53	2.35	1.65	8.54	5.03	9.91	0.75	7.16	2	4	0	0	0	0
73	0	0	1	52	2.53	4.22	0.6	0.82	9.49	0.86	0.82	12	4	3	1	1	1
77	0	0	1	70	1.34	4.36	13.18	7.57	12.4	1.82	2.67	2.5	4	2	1	1	1
78	0	0	1	59	5.18	1.88	13.77	7.39	15.18	4.72	6.23	7	4	2	1	1	1
82	0	0	1	69	2.09	1.35	9.75	4.41	28.49	0.64	6.11	3	4	0	0	0	1
84	0	0	1	65	2.31	2.98	3.13	2.52	6.58	16.14	1.74	4.8	4	3	0	1	1
85	0	0	2	46	1.8	0.29	27.92	13.13	7.58	3.76	3.27	6	4	3	1	1	1
89	0	0	1	67	2.66	2.58	12.05	4.08	10.71	2.27	2.27	5.8	4	3	1	1	1
91	0	0	1	61	4.7	2.86	34.37	10.26	17.08	3.36	6.21	2.8	4	3	1	1	1
92	0	0	1	64	4.96	2.49	9.3	5.1	9.84	1.51	6.92	3	4	3	1	1	1
94	0	0	1	75	2.54	21.66	23.29	11.58	60.9	4.65	4.47	12	4	0	1	0	1
96	0	0	2	42	0.98	1.65	18.32	6.61	8.57	0.8	7.7	3	4	2	1	1	1
98	0	0	1	70	1.64	10.07	7.69	6.07	5.06	84.62	3.3	4.5	4	3	1	1	1
102	0	0	1	61	2.51	1.82	5.46	3.96	6.95	4.29	3.23	6	4	3	1	1	1
106	0	0	1	65	1.26	2.43	12.65	6.1	21.5	3.47	4.91	5.5	4	2	1	1	1
107	0	0	1	59	3.3	3.25	25.19	9.64	10.29	0.93	13.31	6	4	3	1	0	0
113	0	0	1	49	2.16	1.92	6.69	3.32	7.27	0.7	3.21	7.5	4	0	1	0	0
114	0	0	1	68	3.75	2.19	5.51	2.1	11.11	1.56	3.79	3	4	3	1	1	1
115	0	0	2	31	1.5	0.76	6.17	2.72	19.07	0.95	1.53	4.5	4	1	1	1	0
116	0	0	2	62	2.78	1.57	2.5	1.58	10.3	0.81	0.81	8	4	3	1	1	0
117	0	0	1	63	2.44	6.84	10.93	4.37	17.2	3.02	4.64	12	4	3	0	1	0
118	0	0	1	58	26.03	3.9	4.84	4.29	11.97	2.5	3.53	5	4	1	1	1	1
119	0	0	2	60	2.56	2.47	0.6	0.56	9.7	4.05	0.91	5.5	4	3	1	1	1
122	0	0	1	68	1.33	0.52	5.55	3.16	7.38	0.98	2.72	3.5	4	2	1	1	1
124	0	0	1	61	1.33	3.49	96.78	26.62	9.19	11.64	26.6	2.3	4	0	0	0	0
126	0	0	2	57	1.8	42	87.74	20.46	95.22	1.39	65.6	7.5	4	3	1	1	1
127	0	0	1	68	2.96	2.29	7.05	4.41	11.28	0.66	2.44	4	4	3	1	1	1
128	0	0	1	38	24.14	3.13	6.14	2.43	8.84	0.57	8.98	4.5	4	3	1	1	1
130	0	0	1	52	1.63	4.86	19.2	8.02	10.74	1.52	16.25	2.7	4	3	1	1	1
131	0	0	1	46	1.33	2.76	172.2	26.86	12.45	9.9	92.55	4	4	3	1	1	1
136	0	0	1	65	1.53	2.15	6.03	5.14	15.18	1.19	2.35	5	4	3	1	1	1
145	0	0	1	71	1.23	2.74	7.02	4.1	7.49	2.54	3.44	4.5	4	3	1	1	1
146	0	0	2	75	2.84	4.75	19.74	9.45	11.73	1.3	5.9	3.8	4	0	0	0	0
151	0	0	1	51	1.74	0.89	5.32	3.09	7.44	0.75	4.63	7.5	4	3	1	1	1
153	0	0	1	53	1.56	2.2	16.09	10.21	11.92	0.95	2.41	3	4	1	0	1	0
154	0	0	2	63	1.77	2.51	6.05	1.55	8.65	10.15	4.48	3	4	0	0	0	1
161	0	0	1	64	3.14	1.77	19.75	5.27	12.17	7.63	8.58	6	4	3	1	1	1
166	0	0	1	70	2.45	8.11	611.7	140.9	11.52	2.66	200	10	4	3	1	1	1
168	0	0	2	63	33.83	79.9	54.82	16.2	66.72	300	14.38	3	4	0	0	0	0
170	0	0	2	62	2.12	1.17	12.79	3.82	8.23	1.5	5.08	5	4	1	0	1	0
171	0	0	1	61	4.22	3.62	4.45	3.47	34.49	1.83	2.03	5	4	2	0	1	0
172	0	0	2	54	2.37	93.37	0.6	1.43	8.12	35.98	1.39	10	4	3	1	1	1
184	0	0	1	63	3.49	3.38	43.82	9.64	11.51	2.35	18.87	6	4	3	1	1	1
186	0	0	2	78	1.51	3.56	146	18.04	9.86	2.21	64.5	10	4	0	1	0	0
189	0	0	1	71	2.3	2.28	25.95	7.07	20.92	4.44	6.97	10	4	3	0	1	1
192	0	0	2	73	3.58	1.76	116.6	21.04	26.58	3.1	12.1	6	4	3	1	1	1
209	0	0	1	68	3.63	4.14	8.87	6.36	7.89	1.3	2.9	2	4	0		0
211	0	0	1	66	1.16	3.58	4.4	3.18	4.67	2.05	2.15	1	4	0	0	0	0
214	0	0	1	60	1.98	2.17	27.01	7.38	11.56	1.06	5.74	5	4	2	1	1	1
216	0	0	2	44	2.72	1.55	22.45	6.45	15.48	1.63	11.86	1	4	2	0	1	0
224	0	0	2	75	0.92	2.08	122.8	36.01	23.62	1.86	32.75	7	4	2	0	1	0
231	0	0	2	48	3.88	6.63	10.62	3.28	35.44	3.09	5.38	6	4	0	0	0	0
232	0	0	2	60	3.05	1.36	5.92	2.51	17.76	1.12	4.44	5	4	1	0	1	1
233	0	0	1	71	0.61	1.86	15.8	4.47	19.59	0.72	3.34	6	4	2	1	1	1
241	0	0	1	41	5.56	1.2	50.22	11.5	4.74	4.89	18.05	5.5	4	2	0	1	0
246	0	0	1	57	1.59	1.5	202.2	37.43	7.26	300	103.4	8	4	3	1	1	1
247	0	0	1	64	2.27	5.58	40.22	12.47	8.12	24.77	16.24	6	4	0	1	0	1
253	0	0	1	64	1.2	2.22	4.59	4.61	20.54	1.39	1.84	4	4	3	0	1	0
264	0	0	1	53	1.26	2.49	23.4	7.82	7.95	3.56	7.09	8	4	3	1	1	1
266	0	0	1	30	3.59	0.8	16.46	5.09	7.94	1.66	8.62	5	4	1	0	0	0
269	0	0	2	46	3.78	1.87	3.12	4.42	16.09	3.37	1.98	8	4	2	1	1	1
270	0	0	2	63	2.37	1.14	13.27	4.13	17.04	1.31	6.79	5	4	2	1	1	1
271	0	0	2	64	1.33	2.7	12.87	4.09	5.51	0.83	3.21	5	4	2	1	1	1
278	0	0	1	79	2.19	1.74	10.02	3.74	14.68	1.18	3.98	8	4	0	1	0	0
280	0	0	1	58	2.52	2.31	35.22	8.53	19.65	3.91	13.39	8	4	3	1	1	1
281	0	0	1	70	3.59	12.84	0.6	2.26	13.15	3.15	0.88	6	4	3	1	1	1
299	0	0	1	56	8.06	2.75	16.55	6.23	17.17	1.31	7.17	7	4	3	1	1	1
300	0	0	2	64	11.28	3.43	0.6	0.77	11.04	11.48	2.31	5	4	3	1	1	1
301	0	0	1	73	2.52	5.32	0.6	1.43	28.09	0.71	2.43	6	4	3	1	1	1
326	0	0	1	64	1.45	3.77	25.38	7.28	8.34	1.54	7.66	6	4	3	1	1	1
366	0	0	1	70	3.33	1.14	14.36	4.87	11.42	2.99	2.95	5	4	1	0	1	0
370	0	0	2	66	3.07	2.06	18.16	6.82	7.6	2.17	12.87	2	4	3	1	1	1
371	0	0	2	47	2.8	0.2	3.37	0.5	11.09	0.78	1.68	4	4	1		1
373	0	0	1	73	2.03	15.27	6.98	1.61	56.49	51.09	3.75	8	4	3	1	1	1
395	0	0	1	75	1.71	6.15	933	176.9	21.08	14.11	157.4	8	4	3	0	1	0
401	0	0	1	59	2.26	2.04	8.03	3.62	5.45	0.92	6.14	1	4	0		0
405	0	0	1	50	1.66	2.3	10.3	4.83	5.98	11.27	7.48	6	4	0		0
414	0	0	2	47	0.88	1.01	0.6	1.29	91.69	7.53	1.65	10	4	3	1	1	0
463	0	0	1	58	2.4	3.5	15.74	4.47	22.45	1	7.36	10	4	2	1	1	1
473	0	0	1	68	1.82	7.23	3.9	3.75	15.08	0.82	1.56	6	4	0	0	0	1
503	0	0	2	43	2.9	1.78	18.34	10.31	27.59	1.53	3.23	8	4	3	1	1	1
510	0	0	1	68	3.72	2.09	14.49	7.09	17.99	1.29	6.21	8	4	3	1	1	1
518	0	0	1	41	1.2	1.91	13.31	5.4	10.51	5.87	5.6	3	4	0	0	0	0
527	0	0	1	63	1.99	2.04	11.24	5.97	7.62	2.51	10.22	8	4	3	1	1	1
535	0	0	2	68	2.82	0.86	4.72	1.04	18.89	0.86	0.63	5	4	1	1	1	1
563	0	0	2	62	4.09	1.56	30.65	10.15	12.07	1.43	17.11	3	4	0	0	0	1
565	0	0	1	66	2.12	1.4	24.27	3.18	50.14	36.37	8.49	8	4	3	1	1	1
566	0	0	1	62	1.51	1.96	9.48	2.25	7.21	1.19	3.71	5	4	0	0	0	0
577	0	0	1	50	1.78	1.39	24.31	15.48	9.32	2.74	3.51	3	4	0
578	0	0	1	53	1.01	1.95	6.83	2.83	8.51	1.41	2.15	1	4	0		0
609	0	0	1	57	2.76	1.73	30.92	5.21	14.08	4.7	20.25	5	4	2	1	1	1
611	0	0	1	52	0.95	1.81	9.58	3.28	7.93	0.88	4.52	1.5	4	0	0	0	0
634	0	0	2	56	2.15	0.9	0.9	1.61	7.66	1.67	1.85	0.8	4	0	0	0	0
636	0	0	2	38	1.34	0.29	10.61	2.76	8.57	1.29	5.01	5	4	0	1	0	1
637	0	0	2	49	3.8	0.89	4.18	0.67	14.04	0.71	1.53	4	4	3	1	1	1
650	0	0	1	63	1.74	1.03	5.06	2.48	9.38	4.16	3.42	5	4	1	0	1	1
954	0	1	2	51	1.68	3.38	169.5	82.5		19.52	24.91	5.5	4	3	1	1	1
957	0	1	1	70	3.5	0.53	3.04	4.7		2.07	1.95	13	4	3	1	1	0
966	0	1	1	73	48.47	3.15	4.97	2.67		1.31	2.94	5	4	0	0	0	0
968	0	1	2	61	1.09	3.87	16.33	5.1		2.56	7.53	5	4	3	1	1	1
970	0	1	2	55	0.75	0.4	8.64	3.59		1.08	5.93	8.5	4	2	0	1	1
972	0	1	2	37	3.5	2.1	0.6	1.61		1.74	1	3.2	4	1	1	1	0
979	0	1	2	59	2.77	1.45	0.73	2.96		1.1	1	10	4	3	1	1	1
981	0	1	1	69	1.22	2.3	61.34	21.68		1.34	26.72	4.5	4	0	0	0	0
984	0	1	1	35	3.82	1.63	6.64	2.61		0.86	2.02	3	4	3	1	1	1
991	0	1	1	51	1.6	2.12	422.5	95.95		3.78	150	2.5	4	3	1	1	0
996	0	1	1	46	4	2	13.01	7.68		3.13	10.46	4	4	3	1	1	1
1006	0	1	1	72	1.37	3.59	20.1	14.16	12.49	9.63	10.08	11	4	2	1	1	1
1007	0	1	1	71	2.77	0.91	3.92	2.81	7.68	1.47	2.85	3	4	2	0	1	1
1038	0	1	1	77	3.21	2.45	11.37	6.07	17.27	13.91	3.73	9	4	1	0	1	0
1041	0	1	1	57	4.9	7.44	0.6	0.5		14.59	1.25	8	4	2	1	1	1
1043	0	1	1	62	2.1	7	10.75	4.75	16.01	8.24	8.3	7.5	4	1	0	1	1
1060	0	1	1	66	2.1	0.66	11.96	5.84	21.96	6.66	3.89	5	4	3	1	1	1
1065	0	1	1	60	2.56	1.67	29.23	12.67		11.61	11.13	6	4	3	1	1	1
1072	0	1	1	66	3.27	0.78	7.58	2.87	18.38	20.1	1.72	5	4	3	1	1	0
1074	0	1	1	58	1.52	3.13	183.1	44.8	13.59	4.85	124.2	8.5	4	1	1	1	1
1077	0	1	1	69	3.69	64.62	307.8	53.07	17.18	2.57	200	3.7	4	1	1	1	0
1085	0	1	2	56	0.89	1.63	16.9	5.95	31.47	2	7.49	10	4	3	1	1	1
1096	0	1	2	69	4.8	1.15	22.58	6.72	24.85	19.66	8.53	6.8	4	0	1	0	0
1097	0	1	2	65	4.5	2.64	28.65	18.21	10.47	61.12	8.79	3	4	2	1	1	1
1100	0	1	1	45	2.26	3.36	116.6	34.78	10.64	5.17	28.32	5	4	0	1	0	1
1103	0	1	2	57	24.08	1.65	6.86	1.46	10.19	19.84	3	10	4	3	1	1	1
1114	0	1	1	67	6.23	3.02	7.79	3.17	23.98	0.81	5.67	4.5	4	2	1	1	1
1133	0	1	2	25	1.12	0.94	1	2.07		0.92	1	11	4	3	1	1	1
1134	0	1	2	45	60.13	0.6	5.25	5.04		2.84	9.2	9	4	3	1	1	1
1144	0	1	1	66	2.27	70.95	1000	391.63		1.08	150	5	4	3	1	1	0
1147	0	1	2	57	1.16	9.73	51.72	15.86		6.76	42.11	6.5	4	3	1	1	0
1148	0	1	1	59	1.93	4.94	3.57	2.34	12.11	2.02	1.97	7	4	0	0	0	0
1153	0	1	1	73	303.3	1.82	44.18	15.1		14.16	15.52	5	4	1	1	1	1
1157	0	1	2	63	4.79	1.51	12.84	4.81		34.46	6.47	7	4	3	1	1	1
1162	0	1	1	68	1.13	0.81	4.75	1.14		1.47	1.77	8	4	0	1	0	0
1168	0	1	2	37	11.62	9.42	1000	233.1	69.41	300	150	5	4	3	1	1	1
8	0	0	2	60	1.32	1.63	26.25	10.57	7.98	0.96	10.97	4	5	1	1	1	1
20	0	0	2	57	25.71	73.6	9.29	4.57	10.62	1.2	3.28	3	5	0	0	0	0
22	0	0	2	81	1.17	8.72	2.73	0.87	28.66	0.71	1.78	6.5	5	3	1	1	1
27	0	0	2	50	533	2.36	9.14	3.49	10.31	0.69	5.94	4	5	0	0	0	1
29	0	0	2	55	1.52	2.66	32.13	11.23	22.02	0.55	9.69	12	5	3	1	1	1
35	0	0	2	66	2.36	2.22	5.66	4.24	7.32	0.88	2.52	11	5	3	1	1	1
47	0	0	1	59	2.98	1.66	5.06	3.36	21.27	2.73	5.48	2	5	0	0	0	0
52	0	0	1	57	7.11	3.1	14.49	6.74	9.75	10.05	5.09	4.5	5	3	1	1	1
55	0	0	2	56	2.23	0.62	14.09	6.48	11.27	0.83	13.25	2.1	5	3	1	1	1
62	0	0	2	65	4.85	3.95	957.9	147	13.01	4.02	200	12	5	3	1	1	1
66	0	0	2	66	2.01	9.94	5.51	4.06	9.81	7.17	2.59	0.8	5	1	0	1	1
68	0	0	1	60	1.19	3.59	145	26.3	11.95	9.51	91.37	7	5	3	1	1	1
74	0	0	2	50	2.68	9.26	26.67	9.39	6.3	42.15	25.96	5.5	5	2	1	1	1
75	0	0	1	60	2.3	2.72	8.04	4.45	8.82	1.94	2.87	10	5	3	1	1	1
81	0	0	1	78	1.01	3.24	16.8	5.04	8.44	4.44	8.46	2.5	5	3	1	1	1
87	0	0	1	70	1.73	6.77	53.71	16.23	25.89	2.24	12.22	5.5	5	2	1	1	1
88	0	0	1	47	1.51	12.29	1000	301.8	37.41	50.36	200	6	5	2	1	1	0
90	0	0	2	74	2.22	2.28	0.6	0.69	5.65	1.6	1.09	2	5	1	0	1	1
100	0	0	1	64	2.33	1.63	6.91	3.87	9.57	1.28	3.43	8	5	3	1	1	1
104	0	0	1	31	1.63	0.59	5.13	3.66	8.9	0.59	2	12	5	3	1	1	1
105	0	0	1	26	1.41	1.54	27.79	7	7.18	10.89	5.92	6	5	3	1	1	1
112	0	0	2	50	0.82	3.57	27.94	9.79	12.92	1.72	15.02	6	5	3	1	1	1
133	0	0	1	59	2.74	2.91	1.03	1.03	7.34	0.7	0.84	6	5	3	1	1	1
138	0	0	1	55	1.64	1.43	5.5	3.25	15.69	2.9	3.98	7	5	3	1	1	1
147	0	0	1	58	3.5	1.17	4.16	2.65	11.19	0.94	2.57	4	5	2	1	1	1
956	0	1	1	59	2.47	2.77	314.8	39.79	12.29	2.34	150	12	5	3	1	1	1
958	0	1	1	74	1.3	3.44	315.9	43.33		19.18	49.53	7	5	2	0	1	1
961	0	1	2	45	7.58	1.6	8.05	2.25		3.32	10.86	8	5	3	1	1	1
962	0	1	1	66	3.58	9.34	94.62	33.07		1.39	6.9	6	5	3	1	1	1
963	0	1	1	64	2.47	542.9	15.14	10	80.8	37.02	14.2	8	5	3	1	1	1
964	0	1	1	63	4.34	3.11	0.6	4.06	10.2	9.09	1.25	5	5	3	1	1	1
965	0	1	1	66	3.04	8.54	21.46		18.61			6	5	2	1	1	1
986	0	1	1	51	2.38	3.34	293.1	121.83		1.03	150	3.5	5	3	1	1	1
992	0	1	1	69	4.99	2.38	31	12.4		0.98	13.8	4	5	2	1	1	0
997	0	1	1	47	1.78	1.55	38.31	13.17		2.32	10.19	6	5	3	1	1	1
1018	0	1	1	22	1.02	2.08	6.83	6.33	17.1	0.87	6.5	5	5	2	1	1	1
1020	0	1	2	57	2.21	1.28	12.22	7.78	14.7	12.96	7.65	5.5	5	2	1	1	1
1027	0	1	1	51	2.3	5.17	226.7	134.7		0.6	100.32	6.5	5	3	1	1	1
1045	0	1	2	37	1.3	1.65	0.6	0.54		8.01	0.87	8	5	3	1	1	1
1046	0	1	2	44	2.8	13.65	45.18	9.24	20.55	5.12	38.23	3	5	1	1	1	1
1050	0	1	1	74	1.84	2.92	16.76	6.23	3.52	12.15	7.54	5.5	5	1	0	1	1
1079	0	1	1	54	2.2	2.56	79.4	18.19	14.82	1.99	27.8	7	5	3	1	1	1
1099	0	1	1	47	2.11	1.49	98.18	28.45	8.54	20.19	39.99	7	5	3	1	1	0
1123	0	1	1	69	5.43	5.11	6.42	3.65	41.32	1.46	5.4	3.5	5	0	1	0	1
1132	0	1	1	46	2.14	11.54	1000	180.2		1.2	150	9	5	3	1	1	1
1139	0	1	1	55	2.94	1.56	5.38	3.38		7.19		5	5	3	1	1	1
1155	0	1	2	30	1.04	0.27	15.14	5.96		1.79	3.21	8.5	5	3	1	1	1
1158	0	1	2	35	1.11	3.44	115.3	36.42		2.83	23.56	3	5	3	1	1	1
1166	0	1	2	37	1.43	118.3	432.8	150.72	138.1	300	150	5	5	3	1	1	0
949	0	1	1	31	1.82	1.21	12.56	4.31		1.93	13.89
950	0	1	1	87	2.62	2.01	10.84	3.16		1.68	5.14
951	0	1	1	65	2.76	79.56	1000	500		300	150
952	0	1	2	67	2.48	1.66	37.69	11.34		96.38	24.69
953	0	1	2	60	1.63	27.86	1000	500		132.8	150
955	0	1	1	58	1.53	1.25	10.3	3.64		1.19	2.74
959	0	1	2	56	0.61	9.77	173.4	72.03		3.34	74.63
960	0	1	1	47	2.24	1.9	15.5	4.66		1.89	9.69
967	0	1	1	53	1.49	3.43	699	233.77		300	149.9
969	0	1	1	66	2.11	12.74	1.38	1.82	18.8	22.26	3.58
973	0	1	1	61	2.25	3.24	5.71	2.7	6.94	8.13	5.43
974	0	1	1	57	189	470.9	9.21	7.06		88.26	3.36
975	0	1	1	72	2.38	5.83	80.78	27.56		55.69	15.72
976	0	1	1	73	2.3	1.79	6.43	2.24		3.18	4.08
977	0	1	1	69	1.8	6.15	28.89	18.84		2.73	10.5
978	0	1	2	64	3.3	6.23	0.6	2.3		23.35	1
980	0	1	1	53	6.73	0.43	5.84	2.27		2.57	4.03
982	0	1	1	44	1.36	0.63	3.95	2.84		0.94	4.46
983	0	1	1	73	0.8	1.33	0.6	0.28		3.85	1
985	0	1	1	78	0.78	4.56	215.8	150.11		5.6	6.74
987	0	1	2	75	21.54	8.2	18.99	6.49		12.58	14.85
988	0	1	1	65	2.45	2.36	10.31	3.22		2.13	5.67
989	0	1	1	69	1.48	4.65	6.77	3.14		7.05	5.45
990	0	1	1	64	3.25	1.45	4.47	2.33		87.64	1.57
993	0	1	1	40	6.5	4.76	8.84	5.06	15.99	10.93	3.4
994	0	1	1	63	5.13	3.73	8.94	3.2		2.84	4.67
995	0	1	1	55	1.61	0.75	5	2.33	13.21	1.09	2.84
998	0	1	1	48	6.54	1.21	7.35	4.01		1.13	3.15
999	0	1	2	48	2.71	0.64	1.94	2.64	71.52	7.94	3.13
1000	0	1	1	76	3.85	94.25	23.55		21.3
1001	0	1	2	42	2.93	0.2	10.49	8.65		3.81	6.57
1002	0	1	1	71	1.63	1.43	7.27	2.95		0.9	2.27
1003	0	1	1	68	2.29	17.56	513.7	97.52		6.35	150
1004	0	1	1	80	4.43	8.61	18.65	14.88	10.14	15.89	9.33
1005	0	1	2	56	1.06	1.1	7.95	5.13		2.72	8.24
1008	0	1	2	46	6.7	7.44	11.3	7.92		16.37	6.09
1009	0	1	1	60	2.36	3.8	0.6	0.76	65.72	4.15	1.22
1010	0	1	1	60	2.85	1.2	90.2	42.04		1.59	35.61
1011	0	1	2	65	2.09	0.83	53.02	17.66		19.91	11.09
1012	0	1	1	64	3.78	4.98	10.27	7.17	26.34	0.98	6.85
1013	0	1	1	70	4.17	1.78	31.05	11.54		10.77	7.46
1014	0	1	1	56	3.45	0.59	8.35	6.53	16.69	3.11	3.71
1015	0	1	1	41	118.7	6.85	29.09	13.95	190.9	48.22	3.47
1016	0	1	1	59	2.23	5.8	104.9	53.5	102.7	300	115.18
1017	0	1	1	48	1.12	2.87	14.32	12.13		2.57	9.95
1019	0	1	1	63	3.58	102.2	15.93	17.4	21.27	300	7.16
1021	0	1	2	46	3.69	1.08	7.54	5.93		8.3	2.53
1022	0	1	2	49	4.33	0.49	10.66	6.81		0.93	4
1023	0	1	1	64	3.54	0.79	15.97	8.04		2.78	7.69
1024	0	1	1	67	2.47	1.61	7.72	2.41		0.82	2.17
1025	0	1	1	70	1.65	2.73	2.47	0.75	82.96	62.9	1.34
1026	0	1	1	63	1.79	176.1	1000	500	13.03	300	150
1028	0	1	2	47	3.93	2.71	23.46	9.02	47.95	11.29	10.99
1029	0	1	1	75	1.79	1.16	8.72	4.49	9.09	1.11	2.65
1030	0	1	2	70	5.73	2.16	7.16	6.4	47.37	83.49	3.76
1031	0	1	1	60	2.52	5.93	69.03	43.99	14.38	0.9	36.9
1032	0	1	1	39	2.92	1.75	53.8	18.38		1.41	14.52
1033	0	1	1	68	3.29	1.22	1000	179.3	12.51	21.83	200
1034	0	1	2	67	2.65	2.22	3.46	4.31	13.56	4.22	1.55
1035	0	1	1	66	3.02	1.24	12.77	7.09	32.42	31.54	8.75
1036	0	1	2	71	2.2	1.78	31.07	7.1	13.68	6.63	26.33
1037	0	1	2	53	2.02	4.38	27.19	13.07	8.99	1.64	9.34
1039	0	1	2	63	1.26	4.61	288.9	103.6	10.41	2.03	1.78
1040	0	1	1	71	2.92	2.24	0.6	0.62	17.43	280.5	1.23
1042	0	1	1	79	1.57	3.36	9.01	4.41	68.18	6.1	2.03
1044	0	1	1	66	0.62	103.2	13.97	6.56	56.77	116.1	6.66
1047	0	1	1	38	1.74	2.97	15.52	6.48	11.57	0.76	11.01
1048	0	1	1	62	2.24	5.82	6.59	3.45	8.07	0.64	2.67
1049	0	1	2	51	2.86	2.09	30.31	14.51	19.69	4.63	23.15
1051	0	1	1	76	0.61	1.82	4.79	2.01	3.7	23.06	2.74
1052	0	1	2	70	1.56	1.36	10.51	4.84	21.41	1.2	3.41
1053	0	1	1	68	2.74	2.74	9.31	6.17	17.26	2.64	6.81
1054	0	1	2	57	4.07	1.07	3.49	1.7	157.2	5.46	2.08
1055	0	1	1	52	33.98	1.64	10.6	3.44	60.33	7.55	10.79
1056	0	1	2	60	2.62	1.34	4.66	2.27	184.4	21.74	3.58
1057	0	1	2	66	3.3	20.44	1000	148.4	118.2	218.7	200
1058	0	1	1	76	4.84	3.67	24.82	7.93	15.91	1.28	4.45
1059	0	1	1	73	17.49	7.06	190.2	58.89	12.78	0.85	61.85
1061	0	1	1	67	1.29	3.78	33.08	13.63	127.7	1.93	22.44
1062	0	1	1	53	2.85	3.67	133.2	28.24	167.8	5.8	8.99
1063	0	1	2	67	3.81	2.26	123.1	43.87	58.14	46.75	57.39
1064	0	1	1	68	2.67	1.85	25.75	19	24.31	300	12.88
1066	0	1	1	63	2.23	46.69	312.4	68.84	22.75	74.55	157.4
1067	0	1	1	47	4.49	2.38	16.83	7.22	138.3	174.4	7.17
1068	0	1	2	74	2.29	128.1	1000	165.2	28.75	21.87	200
1069	0	1	2	44	3.12	3.41	26.29	8.23	18.79	2.19	5.99
1070	0	1	2	45	9.24	0.85	12.45	3.7	98.78	2.53	6.84
1071	0	1	2	70	1123	2.09	64.79	13.65		0.99	15.15
1073	0	1	1	67	9.04	1.79	12.76	5.08	44.03	12.18	5
1075	0	1	2	67	3.27	2.8	0.67	0.5	11.05	1.43	2.56
1076	0	1	1	46	1.42	1.33	11.63	3.95	22.19	15.85	6.18
1078	0	1	2	54	2.36	21.48	99.67	29.6	203.2	2.13	9.79
1080	0	1	1	62	13.1	25.1	209.2	43.72	63.48	31.8	108.2
1081	0	1	1	60	4.33	180.5	7.68	3.09	187.4	48.6	3.29
1082	0	1	1	61	2.52	0.85	11.81	4.58	25.32	0.76	4.56
1083	0	1	1	65	1.63	1.63	0.6	0.5	91.16	20.66	1.04
1084	0	1	1	53	3.31	0.85	6.94	3.56		1.12	4.74
1086	0	1	2	59	2.24	3.74	18.34	6.13	8.75	12.31	9.47
1087	0	1	2	28	0.81	7.01	0.85	0.5	41.11	28.89	0.94
1088	0	1	1	57	3.03	3.04	4.98	1.62	1.62	11.49	1.87
1089	0	1	2	60	3.35	2.37	6.48	3.91		3.35	4.19
1090	0	1	1	63	2.83	1.61	17.69	3.68	117.8	1.89	4.44
1091	0	1	1	71	1.32	1.11	8.89	2.59	9.74	19.58	2.21
1092	0	1	1	60	2.72	1.51	0.6	0.5		1.39	2.14
1093	0	1	2	62	1.11	1.08	5.18	3.29	8.21	1.57	2.82
1094	0	1	1	60	1.64	1.74	1.13	0.5	12.8	1.18	0.5
1095	0	1	2	45	2.42	0.83	20.78	6.02	72.69	3.16	3.93
1098	0	1	1	61	3.15	56.44	9.89	4.16	13.15	274.8	2.67
1101	0	1	2	74	6.98	13.35	175.6	43.55	16.58	47.16	34.76
1102	0	1	1	69	2.74	2.91	0.6	0.5	17.21	14.14	1.38
1104	0	1	1	64	2.11	5.72	1.15	0.8		13.26	1.64
1105	0	1	2	27	3.01	14.33	1000	500	33.78	14.57	200
1106	0	1	1	72	2.01	12.07	1000	500	34.62	68.8	200
1107	0	1	1	25	1.45	3.74	556.7	118.5	27.16	46.96	200
1108	0	1	1	66	1.25	20.03	5.84	2.37	28.34	22.99	3.25
1109	0	1	1	53	2.33	5.71	19.42	8.78	23.54	1.51	6.8
1110	0	1	1	73	8.52	6.63	38.55	9.79	33.56	300	14.37
1111	0	1	1	74	2.05	4.72	779.5	116.8	13.54	5.42	200
1112	0	1	1	76	4.23	79.62	17.77	7.95	19.49	113.3	6.08
1113	0	1	1	74	6.78	1.18	4.63	4.08	12.45	19.73	3.29
1116	0	1	2	55	2.28	5.74	19.35	8.02		5.94	11.6
1117	0	1	2	56	3.13	19.53	2.91	0.7	56.07	45.36	1.12
1118	0	1	1	71	1.37	2.53	87.41	19.34	36.41	42.62	20.31
1119	0	1	1	77	1.69	4.84	16.74	10.22	18.72	2.41	7.4
1120	0	1	2	47	0.61	1.3	27.06	8.72	27.02	0.8	12.43
1121	0	1	1	56	2.8	0.98	2.79	1.57	18.36	2.83	2.64
1122	0	1	1	37	2.47	0.96	4.63	2.48	12.74	13.44	2.53
1124	0	1	1	55	1.47	0.94	16.16	4.43	52.39	0.88	10.41
1125	0	1	1	39	2.9	26.88	3.62	2.17		90.88	5.39
1126	0	1	2	45	1.66	1.1	12.12	5.44		1.91	5.66
1127	0	1	2	41	5.31	1.65	19.27	4.84		2.73	1
1128	0	1	2	46	1.19	1.29	6.09	2.16		5.42	3.84
1129	0	1	2	63	2.48	2.3	9.82	3.59		4.53	5.85
1130	0	1	2	49	3.93	2.68	0.6	1.04		1.68	1.7
1131	0	1	1	78	2.48	1.55	7.12	4.54		10.15	5.55
1135	0	1	1	63	3.47	4.44	1000	500		5.54	150
1137	0	1	1	46	2.2	1.52	14.44	4.69		1.53	11.43
1138	0	1	1	66	2.79	5.39	160	33.46		2.44	18.88
1140	0	1	1	57	2.97	1.15	3.77	2.9		2.83	3
1141	0	1	1	81	2.62	17.16	45.73	15.47		8.1	58.19
1142	0	1	2	84	3.11	2.48	29.19	4.82		12	26.47
1143	0	1	1	84	1.92	12.67	19.03	6.41		4.15	16.59
1146	0	1	1	53	2.98	3.77	0.9	4.97		4.83	1
1149	0	1	1	71	4.27	2.29	9.15	5.09		1.01	6.28
1150	0	1	2	26	0.89	0.94	22.09	7.56		7.58	7.92
1151	0	1	1	31	3.11	2.21	9.3	4.22		8.22	6.05
1152	0	1	1	40	5.68	1.37	184.7	45.63		3.87	6.4
1154	0	1	1	69	0.7	518.9	270.7	90.69		4.3	150
1156	0	1	1	62	1.37	3.87	16.1	5.37	25.99	5.52	6.77
1159	0	1	1	43	2.05	3.8	45.82	32.73	11.31	186.5	61.31
1160	0	1	1	56	2.23	6.28	12.59	5.05		3.49	6.84
1161	0	1	1	67	4.04	1.95	7.15	3.46	21.43	5.11	6.41
1163	0	1	2	66	2.85	14.2	6.17	3.96		3.18	3.23
1164	0	1	1	67	2.36	2.21	18.78	6.85		12.38	8.65
1165	0	1	2	58	3.12	0.41	8.49	3.77		0.78	5.79
1167	0	1	1	62	2.66	1.89	31.42	3.64		9.39	10.98
1169	0	1	1	57	1.74	2.01	9.78	7.44		14.59	7.87
1115	0	1	1	26	1.89	327.1	3.3	2.1	5.15	229.3	5.15	1.5	2	3	1	1	0
665	1	0	1	69	6.26	1.63	10.93	4.79	8.88	0.82	6.54	2	1	0	0	0	0
666	1	0	1	50	1.84	2.58	15.88	6.64	10.43	1.07	5.24	5	1	0	0	0	0
675	1	0	1	59	3.79	2.29	11.93	6.15	9.19	0.81	3.31	3	1	0	0	0	0
679	1	0	1	71	1.41	2.46	6.34	2.41	5.94	2.54	2.92	2	1	0	0	0	0
681	1	0	2	47	2.8	1.21	11.75	4.28	13.43	2.08	3.91	2	1	0	0	0	0
688	1	0	1	63	3.34	1.1	9.84	4.77	13.36	0.76	2.64	4	1	0	0	0	0
695	1	0	1	58	1.3	2.21	3.8	2	16.73	0.79	1.93	1	1	0	0	0	0
699	1	0	1	66	2.96	4.07	4.33	0.91	11.71	12.23	2.17	2	1	0	0	0	0
704	1	0	1	47	1.82	1.41	8.14	4.27	7	2.83	5.67	4	1	0	0	0	1
708	1	0	2	53	3.07	2.54	1.24	0.59	9.63	0.55	1.33	1	1	0	0	0	0
716	1	0	1	58	2.17	3.09	7.76	6.53	8.23	0.9	2.82	2	1	0	0	0	0
730	1	0	2	63	2.41	1.33	6.3	2.58	12.76	1.78	3.19	5	1	0	0	0	0
731	1	0	1	33	1.42	1.99	5.16	3.76	8.33	2.49	2.46	1.5	1	0	0	0	0
734	1	0	2	51	1.15	1.55	6.94	2.44	17.14	13.23	4.27	3	1	0	0	0	0
739	1	0	1	69	3.56	3.01	17.35	4.95	8.69	0.86	10.54	3	1	0	0	0	0
744	1	0	1	57	4.76	3.56	15.06	6.19	12.81	1.39	6.44	6	1	0	0	0	0
748	1	0	1	49	1.79	2.48	0.6	0.5	8.04	3.94	1.5	3	1	0	0	0	0
754	1	0	1	56	32.83	11.6	0.6	0.5	18.62	0.66	0.96	4	1	0	0	0	0
760	1	0	2	72	11.4	1.58	66.88	32.89	8.39	1.88	1.75	5	1	0	0	0	0
761	1	0	1	61	3.66	4.4	4.51	3.38	7.26	3.15	2.83	2	1	0	0	0	0
769	1	0	2	66	1.5	2.83	0.6	0.5	19.31	1.16	1.7	1.5	1	0	0	0	0
774	1	0	1	48	1.52	2.63	15.96	8.35	8.65	13.71	5.63	8	1	0	0	0	0
782	1	0	1	38	1.89	1.61	9.08	2.17	5.6	2.74	12.84	1.5	1	2	0	1	0
786	1	0	1	52	1.9	1.42	5.47	1.87	8.37	1.78	1.67	5	1	0	0	0	0
795	1	0	2	35	1.33	1.56	7.46	2.45	11.41	0.94	4.14	2	1	0	0	0	0
802	1	0	1	54	2.69	1.93	9.66	4.77	9.15	4.29	1.55	2	1	0	0	0	0
808	1	0	1	52	1.47	6	23.62	6.82	7.41	1.08	8.11	3	1	0	0	0	0
809	1	0	1	59	2.42	6.89	14.61	5.3	17.8	0.91	2.43	1.2	1	0	0	0	0
816	1	0	1	49	3.67	3.42	10.08	3.43	13.36	8.38	4.87	2.5	1	0	0	0	0
819	1	0	1	49	4.23	4.25	19.41	5.69	15.16	3.43	8.1	1.5	1	0	1	0	0
822	1	0	2	65	2.48	0.9	6.17	1.9	8.86	1.5	2.63	1	1	0	0	0	0
825	1	0	1	50	4.1	1.89	13.64	2.8	5.16	0.59	7.5	4	1	0	0	0	0
831	1	0	1	57	4.5	3.32	9.67	3.22	4.11	0.82	5.59	1.5	1	0	0	0	0
838	1	0	1	61	6.23	2.07	13.13	4.77	8.53	6.84	3.24	1.2	1	0	0	0	0
844	1	0	1	66	1.65	2.47	7.31	2.17	29.76	4.23	2.97	3	1	0	0	0	0
845	1	0	2	61	8.25	3.06	11.53	3.83	6.52	0.67	3.54	3	1	0	0	0	0
848	1	0	1	65	1.23	1.15	8.41	2.78	4.13	0.72	3.66	2	1	0	0	0	0
852	1	0	2	49	1.67	1.01	10.36	2.79	20.37	3.97	3.66	1	1	0	0	0	0
857	1	0	1	66	3.17	4.26	7.85	2.61	11.38	4.39	3.58	4	1	0	0	0	0
859	1	0	1	67	1.31	1.22	10.33	4.09	6.13	5.47	2.64	1	1	0	0	0	0
862	1	0	2	56	6.23	1.68	9.41	9.34	12.95	0.58	5.29	2	1	0	0	0	0
863	1	0	1	54	8.53	1.23	8.53	7.93	16.95	1.7	9.24	2	1	0	0	0	0
872	1	0	1	57	2.52	2.82	6.17	3.27	6.7	5.32	4.86	3	1	0	0	0	0
882	1	0	1	58	4.55	1.43	5.99	3.04	6.19	1.81	3.01	4	1	0	0	0	0
883	1	0	1	44	0.87	2	9.53	4.76	7.82	2.84	4.66	2	1	0	0	0	0
888	1	0	2	48	1.48	0.74	10.74	5.2	15.17	1.21	3.22	3	1	0	0	0	0
889	1	0	1	55	2.31	2.45	9.93	3.54	3.08	0.79	8.4	4	1	1	0	1	0
907	1	0	1	47	3.31	6.93	24.99	9.73	10.58	0.82	11.74	3	1	0	0	0	0
910	1	0	1	64	1.88	3.62	13	4.61	14.41	1.92	4.38	5	1	0	0	0	0
912	1	0	1	40	2.92	6.16	0.6	0.5	9.98	1.45	0.94	2	1	0	0	0	0
913	1	0	2	45	4.18	0.34	8.49	5.86	13.59	2.06	3.97	2	1	0	0	0	0
921	1	0	2	39	3.16	0.76	0.6	0.67	32.33	6.76	0.72	1	1	0	0	0	0
923	1	0	2	55	3.14	2.1	21.55	8.36	8.86	1.07	12.43	3	1	0	0	0	0
936	1	0	1	48	5.9	1.14	4.07	2.61	8.45	2.69	2.08	4	1	0		0
937	1	0	2	71	1.8	1.8	6.39	3.4	11.35	1.58	2.56	1	1	1	0	1	0
939	1	0	2	45	2.73	2.98	17.23	7.87	13.26	2.37	10.98	3	1	0	0	0	0
943	1	0	2	73	2.69	9.54	18.1	4.8	8.94	0.91	9.78	1.5	1	0	0	0	0
668	1	0	1	61	3.35	2.79	9.09	3.92	6.85	1.71	3.56	2.2	2	1	1	1	1
677	1	0	1	64	2.42	2.14	8.43	3.71	6.5	3.04	1.68	4.5	2	1	1	1	1
682	1	0	1	51	2.36	3.58	0.87	0.5	8.92	1.78	0.5	5	2	0	0	0	0
683	1	0	1	25	4.31	11.59	0.6	0.5	18.04	0.71	0.9	3	2	3	0	1	1
686	1	0	1	65	1.74	2.64	17.57	8.03	7.29	2.51	7.18	1.5	2	0	0	0	0
687	1	0	1	72	1.64	3.83	44.55	12.24	9.45	2.89	18.75	8	2	1	1	1	0
690	1	0	1	73	2.37	8.82	24.3	9.33	8.52	1.36	9.48	2	2	0	0	0	0
692	1	0	1	52	2.01	6.92	21.71	7.03	5.31	0.91	11.47	5	2	0	0	0	0
697	1	0	1	55	2.35	2.35	26.85	18.13	9.13	3.76	4.08	5	2	0	0	0	1
702	1	0	1	70	2.09	3.05	4.94	3.1	9.34	1.38	2.39	2	2	0	1	0	0
703	1	0	2	37	3.51	1.3	12.3	4.14	9.91	0.73	6.5	1.5	2	0	0	0	1
707	1	0	2	61	4.11	1.29	16.65	8.05	6.27	10.53	4.94	4	2	0	0	0	0
710	1	0	2	69	5.03	6.1	6.19	3.28	10.33	2.55	3.48	2	2	0	0	0	1
717	1	0	1	61	2.57	2.33	11.46	9.03	5.89	1.26	6.31	2	2	0	0	0	0
718	1	0	1	50	2.85	3.81	14.01	6.78	6.14	1.81	6.81	5	2	0	0	0	0
719	1	0	1	60	2.26	6.16	5.43	2.5	10.79	2.05	3.76	4	2	1	0	1	0
721	1	0	1	53	3.1	2.43	22.49	9.42	13.89	0.83	10.58	1.5	2	0	1	0	0
723	1	0	1	70	2.37	4.53	11.24	5.77	13.4	4.62	3.51	1.5	2	0	0	0	0
724	1	0	1	64	3.99	4.89	16.37	6.61	7.95	1.59	7.42	5	2	0	0	0	0
726	1	0	1	55	1.96	0.54	6.23	3.02	6.13	6.54	4.57	2	2	0	0	0	1
732	1	0	1	48	2.05	1.64	3.47	1.6	10.93	0.77	1.29	2	2	1	1	1	0
736	1	0	1	54	2.39	2.56	6.74	3.21	7.33	2.15	3.94	4	2	1	1	1	0
742	1	0	2	34	1.41	1.83	13.93	4.24	15.24	1.07	7.39	2	2	0	0	0	0
743	1	0	1	67	2.47	2.27	50.21	20.02	15.33	0.91	8.99	2	2	1	0	0	0
747	1	0	2	64	3.77	1	6.51	2.74	7.28	43.85	3.17	5	2	1	0	1	1
749	1	0	2	62	1.26	1.97	7.9	4.5	7.6	1.61	4	5	2	0	1	0	1
750	1	0	2	67	6.99	2.4	16.38	7.5	11.81	0.88	5.24	10	2	1	1	1	1
751	1	0	2	74	3.23	4.52	15.03	3.73	11.76	3.95	6.05	3	2	0	0	0	0
757	1	0	2	46	0.8	1.02	4.68	2.65	15.04	0.99	2.07	3	2	2	0	1	1
759	1	0	1	60	4.48	3.91	0.6	0.5	7.08	12.48	0.69	2	2	0	0	0	0
763	1	0	1	33	1.55	1.12	7.53	6.16	4.78	5.29	4.55	2	2	0	0	0	0
766	1	0	1	54	5.35	4.64	13.84	6.88	12.51	8.46	7.91	2	2	0	0	0	0
768	1	0	2	76	3.3	1.15	6.91	3.1	8.78	3.53	4.13	4	2	0	1	0	0
770	1	0	2	29	3.14	1.36	20.97	7.75	16.45	0.2	11.97	2	2	0	0	0	1
771	1	0	1	49	2.71	1.58	8.75	4.27	8.93	5.42	9.2	2	2	0	0	0	0
773	1	0	1	51	1.93	1.42	10.44	5.89	6.18	0.2	7.52	3	2	0	0	0	0
775	1	0	2	69	1.43	1.62	9.66	4.37	18.75	1.61	3	3	2	3	0	1	0
777	1	0	1	68	2.25	2.67	4.65	2.93	6.26	1.64	2.16	2	2	1	0	1	0
784	1	0	1	51	2.35	2.69	6.92	1.31	8.35	4	1.35	1.5	2	0	0	0	1
787	1	0	1	35	2.98	2.09	1.05	0.5	10.95	0.7	0.5	12	2	2	1	1	1
788	1	0	1	60	3.28	2.45	10.11	3.47	6.77	0.96	3.07	4	2	1	1	1	1
789	1	0	1	76	4.48	3.68	20.55	5.35	10.62	1.41	4.53	8	2	1	1	1	0
792	1	0	1	62	4.34	2.75	8.53	2.33	11.83	12.03	2.7	3	2	1	0	1	0
796	1	0	1	45	5.97	2.57	18.54	7.86	19.37	16.2	8.6	5	2	0	0	0	0
805	1	0	1	70	2.58	2.71	14.31	7.46	10.42	2.35	3.89	4	2	1	0	1	0
806	1	0	1	50	1.14	2.78	7.28	1.81	3.19	6.83	1.4	3	2	0	0	0	0
807	1	0	1	56	2.08	1.62	15.87	2.93	13.72	20.08	5.64	3	2	1	1	1	0
814	1	0	2	56	0.93	0.72	8.8	3.24	17.91	2.39	3.32	2	2	0	1	0	0
821	1	0	1	55	3.27	1.51	10.95	2.79	7.09	0.39	2.81	4	2	0	0	0	0
823	1	0	2	63	1.46	2.01	41.89	13.34	8.81	7.85	22.75	3.5	2	3	1	1	0
824	1	0	2	60	2.13	1.79	11.24	3.53	11.14	2.44	5.61	2	2	1	1	1	0
826	1	0	2	41	4.02	2.25	19.45	5.18	10.56	0.58	12.16	4	2	0	0	0	0
827	1	0	1	63	1.75	2.89	11.12	2.72	11.06	1.12	4.99	2	2	1	1	1	0
829	1	0	1	64	0.99	2.08	3.68	2	9.62	0.62	2.73	3	2	0	0	0	1
833	1	0	1	62	2.99	0.85	7.18	1.57	16.04	2.04	1.95	3	2	1	1	1	0
842	1	0	2	50	1.58	0.85	3.68	2.23	9.7	1.56	1.52	3	2	0	1	0	0
846	1	0	1	53	3.64	0.91	5.51	2	8.64	0.97	2.71	5	2	0	1	0	0
849	1	0	1	55	1.65	1.77	56.1	15.62	9.16	1.12	16.04	1.5	2	1	1	1	0
850	1	0	1	70	0.95	3.47	0.76	0.5	4.85	0.6	0.96	3	2	0	0		0
854	1	0	2	51	3.41	0.85	4.65	1.15	69.09	0.78	2.84	3	2	3	1	1	1
855	1	0	1	63	1.53	2.62	19.51	5.6	5.57	0.71	7.98	1.5	2	1	1	1	0
860	1	0	2	46	1.63	3.44	154.7	31.12	18.33	16.68	93.97	4	2	2	1	1	1
861	1	0	2	64	1.88	1.85	16.07	3.96	6.75	1.71	5	3	2	3	1	1	0
865	1	0	1	65	5.13	1.66	6.17	2.94	4.34	1.12	3.83	2	2	0	0	0	0
870	1	0	1	61	3.33	1.21	5.14	2.57	9.06	11.35	3.56	2.5	2	0	1	0	0
874	1	0	1	59	1.97	3.01	0.6	0.5	8.46	1.47	1.76	2	2	0	0	0	0
876	1	0	1	55	2.23	5.73	20.38	9.44	3.08	1.24	12.5	2	2	0	0	0	0
877	1	0	1	64	5.01	7.08	19.53	10.43	18.59	1.22	3.99	2	2	0	0	0	0
880	1	0	2	48	9.11	361.9	66.29	11.57	19.98	1.1	37.5	3	2	3	1	1	0
881	1	0	1	74	1.28	2.55	4.39	3.3	7.08	2.37	2.68	3	2	0	1	0	0
884	1	0	1	51	4.93	5.53	9.26	5.76	8.39	4.29	3.15	3	2	0	0	0	0
890	1	0	1	51	1.76	22.53	55.12	22.85	6.92	1.32	10.51	4	2	2	1	1	0
894	1	0	1	64	2.7	0.65	2.4	2.38	14.81	1.57	0.86	4	2	0	0	0	1
897	1	0	2	43	3.61	7.08	6.18	2.58	16.67	30.45	4.12	2	2	1	0	1	0
904	1	0	1	86	3.63	2.04	9.76	3.58	20.22	1.65	2.37	3	2	0	0	0	0
906	1	0	2	29	4.02	0.7	6.37	2.33	6.92	0.87	1.42	3	2	2	1	1	0
915	1	0	1	71	5.17	3.76	16.01	9.29	16.81	1.59	2.12	2.5	2	0	1	0	0
926	1	0	2	51	1.94	0.92	3.63	2.66	11.06	0.8	2.32	4	2	2	1	1	0
930	1	0	2	63	7.48	1.37	7.46	4.52	8.44	1.36	4.86	4	2	1	1	1	0
938	1	0	2	73	4.05	1.63	3.84	2.07	4.35	1.05	2.85	3	2	0	0	0	0
940	1	0	1	56	2.06	2.06	18.58	9.58	10.68	1.24	7.48	2	2	0	0	0	0
941	1	0	1	69	3.81	2.25	0.6	0.5	11.14	1.4	2.05	1.5	2	0	1	0	1
945	1	0	1	50	112	1.53	5.95	2.77	6.51	1.29	4.65	4	2	2	1	1	0
947	1	0	2	63	2.96	3.9	49.15	15.61	6.23	8.11	34.42	4	2	0	0	0	0
948	1	0	2	47	4.85	0.44	8.88	3.6	11.28	3.7	3.48	2.5	2	1	1	1	1
667	1	0	1	44	4.5	3.14	13.76	4.17	7.32	0.85	6.4	7	3	2	1	1	1
669	1	0	2	57	1.65	2	11.64	4.72	9.9	2.94	4.22	6	3	3	1	1	1
670	1	0	2	70	2.62	1.83	7.01	3.75	10.17	4.68	3.58	5	3	3	1	1	1
671	1	0	1	66	1.2	29.67	803.4	149.1	12.3	3.46	200	4	3	3	1	1	1
672	1	0	1	61	4.51	1.39	99.59	26.63	11.32	2.55	101.3	5	3	0	1	0	1
673	1	0	1	64	3.15	3.02	4.79	2.31	14.66	22.03	1.55	4	3	2	1	1	1
674	1	0	1	63	2.28	2.93	21.68	7.06	5.85	5.49	11.4	5	3	3	1	1	1
676	1	0	1	57	5.59	1.35	19.49	5.34	14.43	1.01	11.07	5	3	2	0	0	0
678	1	0	2	67	5.38	0.98	0.6	0.5	8.7	1.55	0.91	10	3	0	0	0	1
680	1	0	1	83	4.14	2.99	40.93	11.86	32.02	63.64	8.93	5	3	1	1	1	1
684	1	0	1	65	53.39	1.69	37.35	14.05	12.18	1.1	3.96	4	3	1	1	1	1
685	1	0	1	44	1.16	3.46	11.85	5.47	9.03	0.43	5.42	2	3	0	1	0	1
691	1	0	2	69	3.6	4.69	6.98	1.99	8.9	0.98	2.48	8	3	2	1	1	0
693	1	0	1	70	4.33	3.19	8.17	2.95	7.7	1.24	4.38	5	3	3	1	1	1
694	1	0	1	50	2.1	1.69	6.62	2.72	7.43	8.22	4.05	7	3	3	1	1	0
696	1	0	1	68	3.02	1.29	171.8	30.46	11.14	5.93	50.41	5	3	3	1	1	1
698	1	0	2	80	0.73	2.48	38.28	12.44	18.73	1.55	12.51	5	3	1	0	1	1
700	1	0	1	59	6.22	3.61	11.7	5.56	9.53	1.87	6.66	4	3	0	0	0	0
701	1	0	1	55	3.1	3.11	5.52	2.85	17.49	1.6	2.74	8	3	3	1	1	1
706	1	0	1	60	2.45	1.02	11.24	3.42	6.69	42.25	5.5	5	3	3	1	1	1
709	1	0	2	63	2.44	2.99	89.56	25.19	9.81	2.44	45.91	5	3	1	0	1	1
711	1	0	1	45	2.16	0.96	17.41	3.82	16.99	1.88	6.51	10	3	3	0	1	0
712	1	0	1	41	5.79	2.55	12.17	6.02	9.91	17.74	6.16	5	3	3	0	1	0
713	1	0	2	61	2.19	1.07	13.4	4.14	7.13	14.22	6.63	1.5	3	1	1	1	0
714	1	0	1	65	1.66	4.26	26.41	10.98	7.88	0.73	7.35	3	3	0	1	0	1
715	1	0	2	36	1.03	0.85	11.99	7.37	8.72	2.36	2.36	8	3	2	1	1	1
725	1	0	2	60	3.2	2.06	9.27	3.74	5.95	3.38	4.85	10	3	3	0	1	1
728	1	0	1	58	4.2	1.53	0.6	0.5	4.34	6.98	2.23	5	3	1	1	1	1
729	1	0	1	74	3.09	1.64	115.8	24.67	10.53	4.67	109	8	3	3	1	1	1
733	1	0	2	62	3.68	4.55	46.28	15.61	34.72	0.45	30.15	5	3	3	1	1	1
735	1	0	1	72	1.64	18.84	12.81	6.82	14.15	2.44	4.12	3	3	0	1	0	0
738	1	0	1	64	4.68	11.97	42.37	9.12	11.92	20.63	20.3	8	3	2	1	1	1
740	1	0	1	50	1.58	0.77	6.33	2.66	8.81	1.08	4.42	6	3	0	1	0	1
741	1	0	1	48	3.36	6.8	28.34	8.99	6.73	1.75	16.56	4	3	0	0	0	1
746	1	0	1	61	3.61	10.06	6.74	1.22	17.61	3.99	3.55	5	3	1	1	1	1
752	1	0	2	74	5.13	4.08	9.64	4.08	22.87	2.27	3.42	6	3	2	1	1	0
753	1	0	2	70	5.65	1.53	264	48.6	20.89	67.28	165	6	3	3	1	1	1
755	1	0	2	56	3.65	3.47	3.45	2.18	13.1	1.53	2.43	6	3	2	0	1	1
756	1	0	1	70	1.36	2.78	8.45	4.77	13.11	1.8	2.04	5	3	2	0	1	1
758	1	0	1	52	10.31	0.92	4.24	2.72	5.39	4.77	1.8	6	3	3	1	1	1
762	1	0	1	70	2.53	1.31	77.62	17.51	6.32	2.13	9.3	3	3	0	0	0	1
764	1	0	1	46	1.91	2.31	3.21	1.83	7.87	2.47	1.59	8	3	3	1	1	1
767	1	0	2	62	3.37	1.1	11.86	5.34	8.98	12.14	5.72	3	3	2	1	1	1
772	1	0	1	60	3.39	3.29	19.25	8.71	4.08	2.51	11.47	5	3	3	1	1	1
776	1	0	1	45	14.12	5.07	0.6	0.5	15.58	145.2	0.97	10	3	1	1	1	0
778	1	0	2	41	4.16	1.34	23.6	7.74	10.7	10.64	12.17	4	3	2	1	1	1
780	1	0	1	66	1.75	4.03	39.08	8.16	6.87	1.73	29.43	5	3	2	1	1	1
781	1	0	1	63	2.3	3.67	20.19	5.69	6.81	1.9	13.93	5	3	3	1	1	1
785	1	0	1	59	3.77	8.82	12.96	2.81	12.27	0.9	3.34	16	3	3	1	1	1
790	1	0	1	65	2.97	4.26	1000	201.1	11.99	3	200	5	3	3	1	1	1
791	1	0	2	61	0.61	0.62	5.83	1.2	26.49	4.41	0.91	10	3	3	1	1	1
797	1	0	1	64	0.7	1.03	10.5	2.42	11.84	3.55	0.5	5	3	3	1	1	0
798	1	0	1	75	4.37	1.21	15.39	5.42	33.22	4.35	6.9	4.5	3	1	0	1	0
800	1	0	1	66	2.29	1.68	12.55	3.76	13.72	1.77	4.26	4	3	3	1	1	0
801	1	0	1	47	8.82	6.89	117.2	26.35	12.02	21.84	117	4	3	3	1	1	1
803	1	0	1	55	1.76	7.64	19.76	7.23	7.88	1.05	6.77	5	3	0	0	0	1
804	1	0	1	67	6.53	33.93	22.76	5.71	4.82	1.71	15.34	8	3	3	1	1	1
810	1	0	1	55	2.25	38.51	248.3	40.94	15.07	7.7	200	4	3	3	1	1	0
811	1	0	2	22	0.61	2.27	22.15	5.14	20.6	0.99	12.85	4	3	2	1	1	1
812	1	0	1	62	2.12	4.07	29.26	7.59	9.06	10.32	16.16	5	3	1	1	1	1
813	1	0	2	32	2.46	1.26	9.86	4.22	15.2	1.48	5.29	6	3	1	1	1	0
815	1	0	2	71	1.43	2.9	11.49	3.88	8.28	0.82	4.4	4	3	0	0	0	0
817	1	0	2	73	1.3	3.47	29.46	10.72	13.39	1.19	11.8	5	3	1	0	1	1
820	1	0	1	63	1.98	2.52	0.6	0.5	13.04	2.05	2.75	3	3	0	0	0	1
828	1	0	2	63	2.09	10.9	26.26	9.33	5.87	7.62	9.99	6	3	1	0	1	1
830	1	0	1	30	2.65	1.85	13.95	2.82	13.06	9.96	4.52	15	3	3	1	1	1
834	1	0	1	55	3.22	2.02	9.58	1.96	7.88	1.47	6.22	5	3	3	1	1	0
835	1	0	2	63	2.15	7.32	45.23	16.29	13.48	1.56	18.88	6	3	0	0	0	1
836	1	0	1	70	1.78	3.98	8.7	1.86	16.66	1.18	3.97	10	3	2	1	1	1
839	1	0	1	69	1.22	1.85	223.6	40.86	33.6	2.46	200	8	3	3	1	1	1
840	1	0	1	60	2.7	1.59	9.67	3.94	8.17	2.39	2.82	1.5	3	2	1	1	0
841	1	0	1	53	1.38	1.98	12.16	3.35	7.81	0.81	4.09	8	3	3	1	1	0
843	1	0	1	64	1.93	3.77	204.1	75.08	13.13	4.02	59.15	10	3	3	1	1	1
847	1	0	2	45	1.46	0.71	4.96	0.5	13.09	0.76	4.11	6	3	1	0	1	1
851	1	0	2	63	2.74	1.28	8.02	1.64	12.06	2.51	2.65	4	3	3	1	1	1
853	1	0	2	72	1.64	3.43	5.94	2.57	26	18.77	2.61	10	3	2	1	1	1
858	1	0	2	68	3.19	15.84	12.19	3.26	12.1	2.14	5.66	5	3	2	1	1	1
864	1	0	2	42	0.61	1.81	10.28	3.87	15.41	1.48	9.44	3	3	3	1	1	1
866	1	0	2	55	1.34	2.56	5.12	3.14	17.17	1.1	3.96	5	3	3	1	1	1
867	1	0	1	72	3.72	4.06	18.8	11.31	12	1.45	5.35	10	3	3	1	1	1
868	1	0	2	68	2.98	1.57	6.55	3.93	7.03	2.64	9.88	4	3	0	1	0	1
869	1	0	1	66	2.14	4.56	467	70.41	20.59	7.08	200	8	3	3	1	1	1
871	1	0	2	55	1.12	1.55	8.27	3.66	24.9	1.27	5.13	3	3	3	1	1	1
873	1	0	2	59	2.71	2.24	8.47	3.54	9.91	2.34	4.86	3	3	3	1	1	1
875	1	0	1	67	5.31	1.84	4.89	2.5	5.91	1.56	5.41	5	3	0	0	0	1
878	1	0	1	54	2.33	1.6	7.34	3.66	8.32	1.69	4.22	5	3	2	1	1	1
891	1	0	1	65	2.39	2.2	7.84	11.06	9	2.13	2.84	5	3	0	1	0	1
892	1	0	2	61	1.37	2.29	0.6	0.5	7.67	19.05	0.91	5	3	0	0	0	0
895	1	0	1	60	5.18	2.53	6.54	2.98	9.55	1.46	2.18	5	3	2	1	1	1
896	1	0	1	63	4.49	4.7	53.06	10.29	20.46	12.51	34.98	5	3	3	1	1	0
898	1	0	1	60	3.05	0.74	25.99	4.83	5.44	3.01	16.83	3	3	2	1	1	1
899	1	0	1	58	2.88	1.58	323.2	53.28	6.83	39.31	115.2	3	3	2	1	1	0
900	1	0	1	73	2.7	10.35	181.7	53.73	14.42	2.66	97.31	5	3	0	0	0	1
901	1	0	1	60	2.06	0.86	2.25	1.83	13.34	5.9	1.9	3	3	3	0	1	1
902	1	0	2	66	2.62	2.62	27.72	8.58	11.1	3.79	15.05	9	3	0	1	0	0
903	1	0	1	77	1.96	6.86	20.66	7.29	18.67	1.69	8.22	8	3	1	1	1	1
905	1	0	2	43	3.36	0.62	12.75	6.41	16.02	0.95	7.86	3	3	0	0	0	1
908	1	0	1	60	5.16	6.83	14.6	7.38	15.17	37.52	3.68	6	3	1	1	0	1
911	1	0	1	47	4.85	1.44	7.9	3.55	7.9	1.47	2.83	3	3	3	1	1	1
914	1	0	1	64	5.95	2.41	1	0.5	12.24	1.36	1.08	4	3	0	0	0	0
916	1	0	1	58	3.84	2.36	9.92	3.17	9.03	2.63	3.09	5	3	1	0	1	1
917	1	0	2	50	2.8	0.75	3.44	2.27	6.6	2.97	1.71	6	3	3	1	1	1
919	1	0	1	68	1.6	2.68	6.7	2.97	13.73	3.14	2.48	3	3	0	0	0	1
920	1	0	2	54	1.83	1.97	0.76	0.5	9.17	2.42	0.5	3	3	3	1	1	1
922	1	0	1	76	2.93	2.96	9.24	4.27	7.39	7.46	3.05	4	3	0	1	0	0
924	1	0	1	58	3.47	2.25	6.46	3.57	7.7	1.33	3.37	3	3	0	0	0	0
925	1	0	1	39	0.91	0.55	4.5	3	12.09	39.92	2.15	5	3	3	1	1	1
927	1	0	1	65	1.83	2.81	15.09	7.24	25.15	0.98	5.11	6	3	3	1	1	1
928	1	0	2	49	2.37	1.29	12.24	5.67	11.21	0.59	5.89	3	3	3	1	1	1
929	1	0	1	55	3.8	1.37	13.88	6.81	16.71	2.45	6.43	5	3	3	1	1	1
932	1	0	1	60	4.92	5.04	9.44	3.84	6.13	1.4	6.21	5	3	3	1	1	1
933	1	0	1	76	2.14	2	8.36	5.79	11.76	1.6	2.93	6	3	1	1	1	1
934	1	0	1	56	4.04	1.08	2.64	1.93	7.73	1.1	2.01	6	3	0	1	0	0
935	1	0	2	50	16.67	2.51	109.7	25.5	27.68	15.8	53.95	3	3	3	1	1	1
942	1	0	2	56	1.49	2.18	7.97	5.67	17.77	1.23	7.27	4	3	3	1	1	1
944	1	0	2	56	3.9	0.99	5.81	1.08	20.37	3.25	4.09	12	3	2	1	1	1
946	1	0	2	50	3.93	3.93	11.16	5.25	11.05	5.71	5.58	3	3	2	1	1	1
689	1	0	1	64	2.93	2.01	7.07	2.81	9.85	5.66	3.64	5	4	3	1	1	1
705	1	0	1	70	1.5	2.71	56.65	10.66	26.88	2.04	23.58	10	4	1	0	1	0
720	1	0	1	54	2.02	6.31	4.29	3.71	5.65	1.13	2.88	5	4	0	0	0	0
722	1	0	2	69	1.07	12.18	4.81	1.88	28.02	3.04	2.88	8	4	2	1	1	1
727	1	0	1	55	2.05	0.88	7.78	3.09	7.77	1.05	5.29	2	4	0		0
737	1	0	1	66	2.23	29.9	10.26	3.69	6.58	60.62	4.8	3	4	3	1	1	1
745	1	0	1	63	1.73	2.64	29.52	5.46	9.93	5.57	15.53	6	4	2	0	1	1
765	1	0	1	52	3.18	1.82	18.18	8.26	6.33	21.05	9.43	8	4	3	1	1	1
779	1	0	1	54	2.62	1.13	7.34	2.51	7.94	2.47	2.81	1	4	0	1	0	0
783	1	0	1	43	2.46	3.32	18.01	2.72	10.91	0.59	5.3	1.2	4	0	0	0	0
793	1	0	1	58	2.22	5.4	370.8	49.04	49.34	53.99	121.4	8	4	3	1	1	1
794	1	0	2	54	2	1.23	28.2	5.93	13.14	0.2	11.42	1.5	4	0	0	0	0
799	1	0	2	79	1.17	2.86	113.4	27.71	9.6	26.14	75.58	6	4	3	1	1	1
818	1	0	2	55	1.07	1.32	4.95	2.55	5.43	13.66	1.7	8	4	1	1	1	1
832	1	0	1	55	1.71	0.6	14.96	1.98	16.3	0.72	6.21	3.5	4	1	1	1	0
837	1	0	1	60	3.68	4.3	3.95	0.74	9.28	2.76	1.34	5	4	0	0	0	1
856	1	0	1	70	2.55	13.25	19.32	8.63	9.85	6.22	5.5	4	4	2	1	1	1
879	1	0	1	78	40.57	5.28	10.92	2.19	14.54	1.11	3.05	6	4	3	1	1	1
885	1	0	2	70	8.24	2.65	5.06	2.43	11.58	10.03	1.92	2	4	0	0	0	0
886	1	0	2	52	1.48	6.1	362.5	90.89	17.26	1.19	50.59	5	4	3	1	1	1
887	1	0	2	31	1.87	1.36	12.64	5.16	13.04	0.82	6.66	10	4	2	0	1	0
893	1	0	1	54	2.96	5.46	488.4	110.8	6.54	3.42	200	10	4	1	1	1	1
909	1	0	1	73	1.84	1.65	10.72	3.52	15.01	3.42	2.93	4	4	0	0	0	1
918	1	0	1	74	2.52	3.74	82.42	22.49	21.71	6.13	108.2	8	4	3	1	1	1
931	1	0	1	49	37.17	1.57	11.25	4	11.53	2.21	5.15	1.5	4	0	0	0	0
1170	1	1	1	49	1.61	0.94	12.88	10.47		6.73	4.28	4.5	4	3	1	1	1
1171	1	1	2	44	2.85	1.92	9.12		135.7	1.6	1.46	4	4	3	1	1	1
1172	1	1	1	71	1.49	3.64	13.31	9.31		16.72	6.38	4	4	3	1	1	1
1234	1	1	1	65	2.51	5.43	11.78	5.28	9.75	42.87	4.91	10	4	3	1	1	0
1235	1	1	2	36	1.48	0.29	29.53	7.33	10.97	1.09	5.53	3.5	4	3	1	1	1
1242	1	1	1	58	1.02	159.2	1000	500		11.28	150	11.5	4	3	0	1	0
1264	1	1	2	62	8.58	1.58	8.49	2.56	14.17	43.97	2.95	3.5	4	3	1	1	1
1183	1	1	1	56	4.26	5.42	388.7	74.85		2.03	150	5	5	3	1	1	1
1186	1	1	2	59	4.04	2.25	19.84	14.5	32.28	0.78	12.34	12	5	3	1	1	1
1189	1	1	2	46	4.63	1.68	7.24	5.14		3.65	6.34	3	5	3	1	1	1
1190	1	1	1	72	1.66	62.34	626.3		34.36	2.45	150	4.5	5	3	1	1	1
1191	1	1	2	42	1.99	0.69	39.17	20.85	47.02	1.15	14.27	3	5	1	0	1	1
1200	1	1	1	64	3.19	3.89	4.15	2.28	6.62	2.69	3.09	4	5	3	1	1	1
1206	1	1	1	77	5.63	1.5	7.87	4.54	13.77	1.12	3.58	7	5	3	1	1	1
1230	1	1	2	30	5.35	1.74	37.94	16.41		1.78	16.83	2.5	5	1	1	1	1
1240	1	1	1	76	1.79	3.6	36.46	18.36		1.52	34.92	2.7	5	1	1	1	1
1241	1	1	1	36	2.38	2.02	8.94		16.39			3	5	3	1	1	0
1245	1	1	1	51	1.88	3.1	0.6	0.4		10.19	1	6	5	2	0	1	1
1253	1	1	1	47	1.16	3.13	1.93	1.82		63.27	5.25	9.5	5	3	0	1	0
1173	1	1	1	59	5.28	5.66	8.01	5.95		1.61	5.02
1174	1	1	1	66	1.62	9.5	7.95	6.21		99.53	4.88
1175	1	1	1	55	2.13	1.07	5.91	2.6	40.91	7.33	7.27
1176	1	1	1	47	1.84	4.95	12.4	5.78		2.32	6.45
1177	1	1	1	65	2.12	1.88	11.9	4.04		16	6.13
1178	1	1	1	61	0.61	6.07	30.96	11.26		2.27	6.37
1179	1	1	2	34	4.63	1.6	5.1	3.04		2.26	1.66
1180	1	1	1	46	5.45	2.42	4.47	3.32		46.84	4.02
1181	1	1	2	34	1.22	1.6	4.01	4.95		1.15	3.82
1182	1	1	2	52	4.46	5.22	1000	500		14.84	150
1184	1	1	1	55	2.03	1.28	6.33	3.45		1.14	4.85
1185	1	1	1	58	1.98	3.6	22.41	12.35	6.57	2.15	12.27
1187	1	1	1	50	3.59	2.59	18.11	12.18		1.1	11.86
1188	1	1	2	40	1.81	0.76	5.54	2.58	15.79	1.43	3.32
1192	1	1	1	40	7.05	3.8	13.86	10.7	11.77	1.18	8.69
1193	1	1	2	58	5.27	0.75	28.13	23.69	19.52	11.92	12.44
1194	1	1	2	48	2.17	1.36	17.28	8.2	7.3	2.57	3.81
1195	1	1	2	31	1.73	9.83	129.1	21.64	13.4	300	88.8
1196	1	1	2	54	2.31	2.12	58.49	13.65	62.98	3.83	15.31
1197	1	1	1	60	4.89	3.93	21.01	7.5	16.33	246	7.13
1198	1	1	1	66	2.56	6.4	13.9	5.87	8.02	2.33	6.82
1199	1	1	2	35	1.83	4.43	48.33	8.54	110.1	3.52	33.37
1201	1	1	1	60	2.49	1.7	20.23	11.03	28.92	2.51	13.29
1202	1	1	2	42	1.38	3.13	300.5	56.61	6.34	26.02	200
1203	1	1	1	55	3.78	4.42	20.96	7.68	62.79	31.47	3.33
1204	1	1	1	53	375.6	634.7	6.61	3.69	13.65	4.62	6.36
1205	1	1	1	69	3.1	1.83	1000	341.4	50.63	99.8	171.2
1207	1	1	1	39	2.49	4.25	5.17	1.5	7.15	2.55	3.43
1208	1	1	1	51	3.19	5.23	47.86	15.08		103.3	25.59
1209	1	1	1	64	1.92	3.78	6.35	2.93	9.91	3.49	2.84
1210	1	1	1	60	1.76	2.06	5.53	2.31	8.41	0.79	3.36
1211	1	1	1	39	1.27	1.95	72.46	15.35		0.75	2.58
1212	1	1	2	48	2.3	28.58	364.4	68.65	6.01	69.08	200
1213	1	1	1	60	2.22	2.53	819.2	103.5	23.16	4.16	168.1
1214	1	1	2	32	2.17	0.83	580.9	120.4	29.04	22.41	87.51
1215	1	1	1	71	4.14	1.18	7.48	3.88		2.61	3.12
1216	1	1	1	62	8.55	2.64	208.4	70.63	13.77	28.33	150
1217	1	1	1	67	7.33	2.25	27.09	10.46	27.99	10.96	5.72
1218	1	1	1	66	1.32	32.08	5.07	0.5	8.63	4.87	2.48
1219	1	1	2	52	4.54	2.08	59.56	14.46	55.74	1.97	6.89
1220	1	1	2	68	2.99	1.67	5.04	2.2	19	2.81	1.12
1221	1	1	2	34	2.19	2.6	26.34	8.72		1.44	12.33
1222	1	1	2	50	1.62	8.65	8.82	4.48	11.27	1.63	3.79
1223	1	1	2	52	2.18	1.2	18.99	4.76	28.01	22.24	5.97
1224	1	1	1	63	2.38	3.31	12.92	5.2	7.16	5.52	6.62
1225	1	1	1	34	2.29	2.61	24.57	7.62	11.53	0.8	7.44
1226	1	1	1	63	1.7	0.71	4.82	2.53	6.76	1.33	3.42
1227	1	1	1	52	2.88	1.5	1.5	2.93	8.17	1.59	4.3
1228	1	1	1	52	2.88	38.34	1.4	0.71	14.77	1.13	3.67
1229	1	1	2	59	2.11	5.5	16.11	4.81	15.79	3.19	2.99
1231	1	1	1	54	2.12	26.31	532.9	84.32	42.3	50.02	42.29
1232	1	1	1	70	1.38	2.94	5.27	1.75	5.86	2.4	3.01
1233	1	1	1	45	3.09	1.91	3.24	0.75	8.05	7.72	1.2
1236	1	1	1	60	1.65	1.22	1.77	0.5	9.42	3.08	2.02
1237	1	1	1	40	5.52	2.62	18.89	5.39	10.45	6.61	7
1238	1	1	1	75	3.5	2.05	8.88	4.85		3.07	8.89
1239	1	1	1	60	3.23	1.95	16.24	3.81		2.45	9.55
1243	1	1	2	64	1.94	23.77	584.3	102.5	12	2.34	150
1244	1	1	1	69	1.58	84.15	1000	500		12.41	150
1246	1	1	1	61	1.11	36.96	69.31	12.26		21.27	21.71
1247	1	1	2	50	3.49	0.66	21.89	10.75		4.05	11.43
1248	1	1	1	60	6.27	3.83	217.7	90.63		3.02	17.68
1249	1	1	1	64	3.79	3.99	1000	500	41.79	9.91	150
1250	1	1	2	51	2.43	0.43	14.54	10.52		67.38	11.95
1251	1	1	1	58	2.95	2.37	6.66	6.69		3.51	3.07
1252	1	1	1	59	43.07	18.54	4.78	3.19	50.8	43.15	3.85
1254	1	1	1	49	0.61	27.01	357.4	81.88	24.14	129.8	200
1255	1	1	1	54	2.65	7.09	6.25	3.23	14.7	9.29	1.99
1256	1	1	1	56	3.89	4.46	28.79	15.24	6.85	0.86	5.57	1.5		0	0	0	0
1257	1	1	2	61	3.63	2.74	12.49	5.12	85.65	4.59	5.37
1258	1	1	1	50	1.29	6.22	100	500	16.6	2.89	150
1259	1	1	1	60	1.64	12.27	16.21	11.1	11	5.51	10.3
1260	1	1	2	47	3.69	2.07	9.14	4.45		17.34	5.6
1261	1	1	2	54	9.3	5.83	170.7	29.63	9.18	6.9	124.7
1262	1	1	1	51	2.5	40.46	5.09	2.27	230.4	192.4	2.09				1
1263	1	1	1	59	2.26	5.38	2.97	0.84	121.5	8.62	3.58
